# Supplementary material
Source: MDPI journal article supplement (https://www.mdpi.com/2305-7084/5/3/38)
Supplement: s1 [file s1 › ChemEngineering-1291371-supplementary.pdf]

# Intraparticle Model for Non-Uniform Active Phase Distribution Catalysts in a Batch Reactor

Emiliano Salucci <sup>1</sup>, Vincenzo Russo <sup>1,2,\*</sup>, Tapio Salmi <sup>2</sup>, Martino Di Serio <sup>1</sup> and Riccardo Tesser <sup>1</sup>

<sup>1</sup> Chemical Sciences Department, University of Naples Federico II, IT-80126 Napoli, Italy; emiliano.salucci@unina.it (E.S.); riccardo.tesser@unina.it (R.T.); diserio@unina.it (M.D.S.)

<sup>2</sup> Laboratory of Industrial Chemistry and Reaction Engineering, FI-20500 Åbo Akademi, Finland; tapio.salmi@abo.fi

\* Correspondence: v.russo@unina.it; Tel.: +39-081-674-036

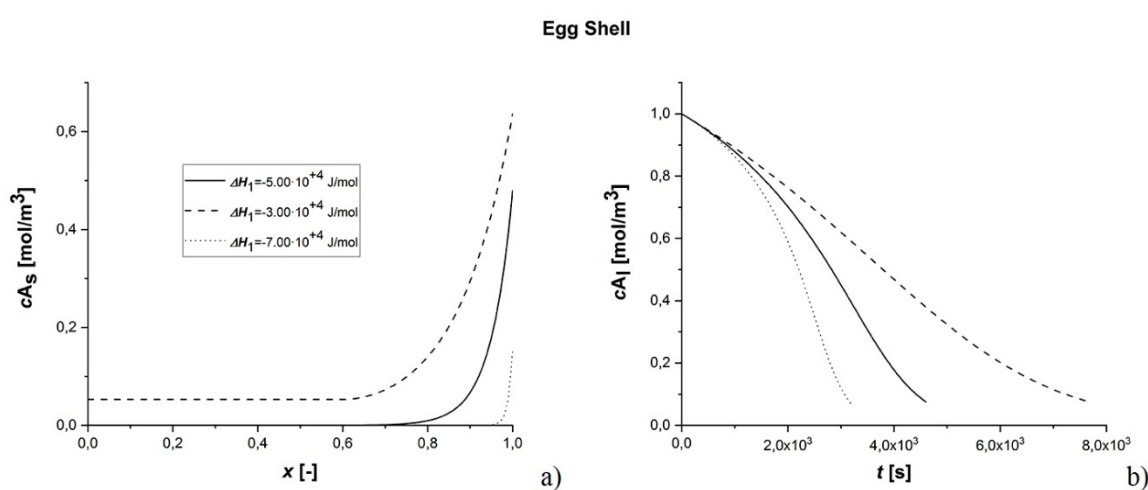

Figure S1. (a) Intraparticle profile of  $c_{As}$  at time  $t = 2.9 \cdot 10^3$  s. (b) Bulk profile of  $c_{Al}$  over time.

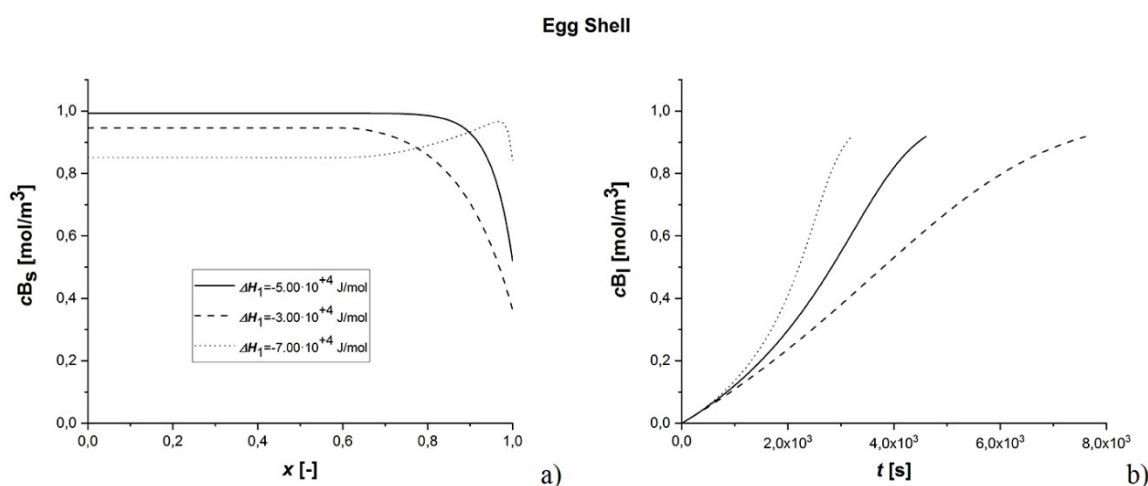

Figure S2. (a) Intraparticle profile of  $c_{Bs}$  at time  $t = 2.9 \cdot 10^3$  s. (b) Bulk profile of  $c_{Bl}$  over time.

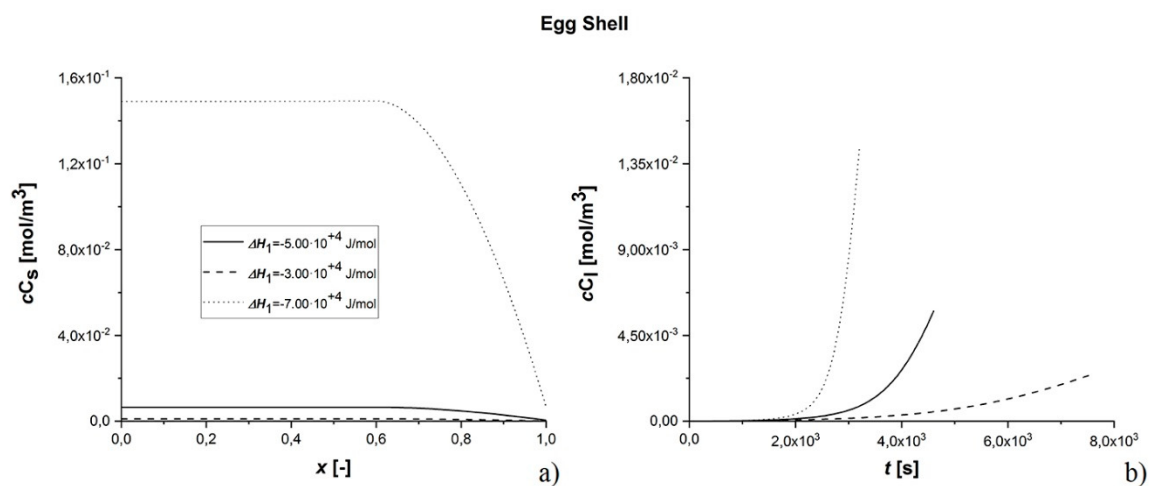

Figure S3. (a) Intraparticle profile of  $c_{Cs}$  at time  $t = 2.9 \cdot 10^3$  s. (b) Bulk profile of  $c_{Ci}$  over time.

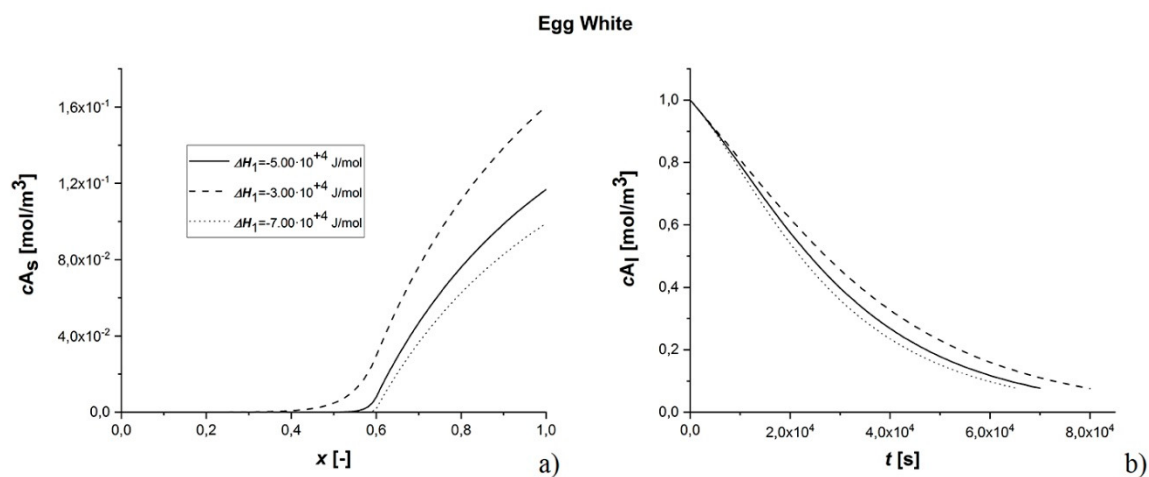

Figure S4. (a) Intraparticle profile of  $c_{As}$  at time  $t = 6.0 \cdot 10^4$  s. (b) Bulk profile of  $c_{Ai}$  over time.

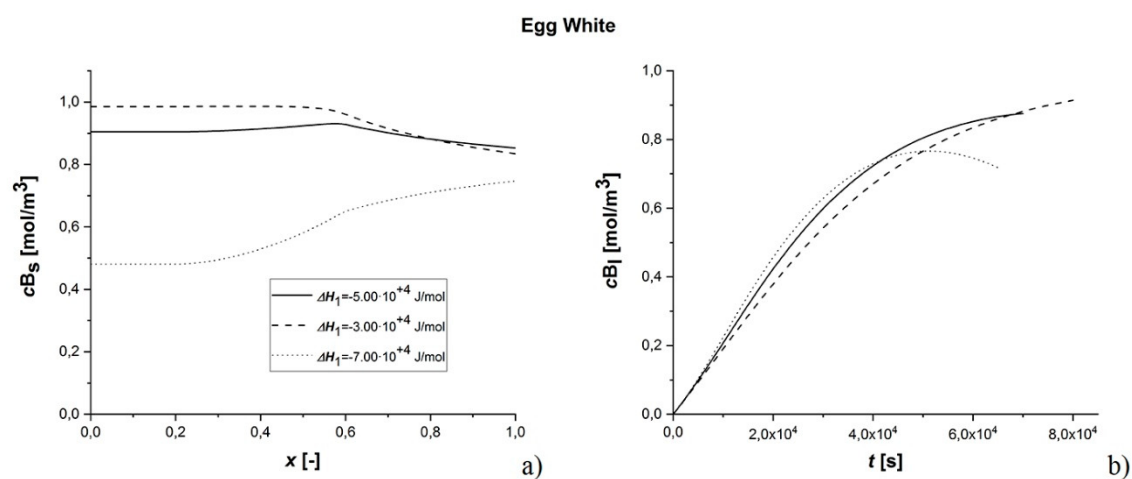

Figure S5. (a) Intraparticle profile of  $c_{Bs}$  at time  $t = 6.0 \cdot 10^4$  s. (b) Bulk profile of  $c_{Bi}$  over time.

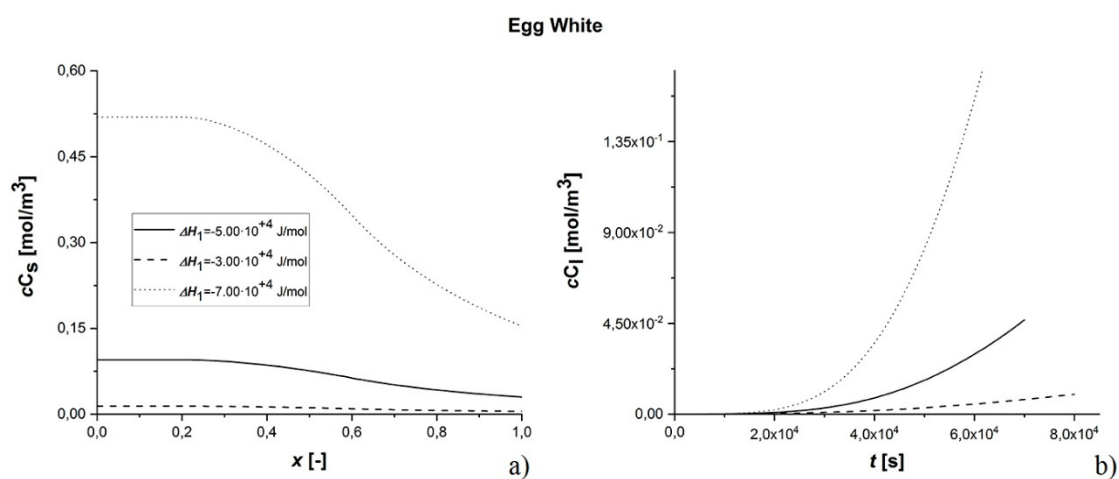

Figure S6. (a) Intraparticle profile of  $c_{Cs}$  at time  $t = 6.0 \cdot 10^4$  s. (b) Bulk profile of  $c_{Ci}$  over time.

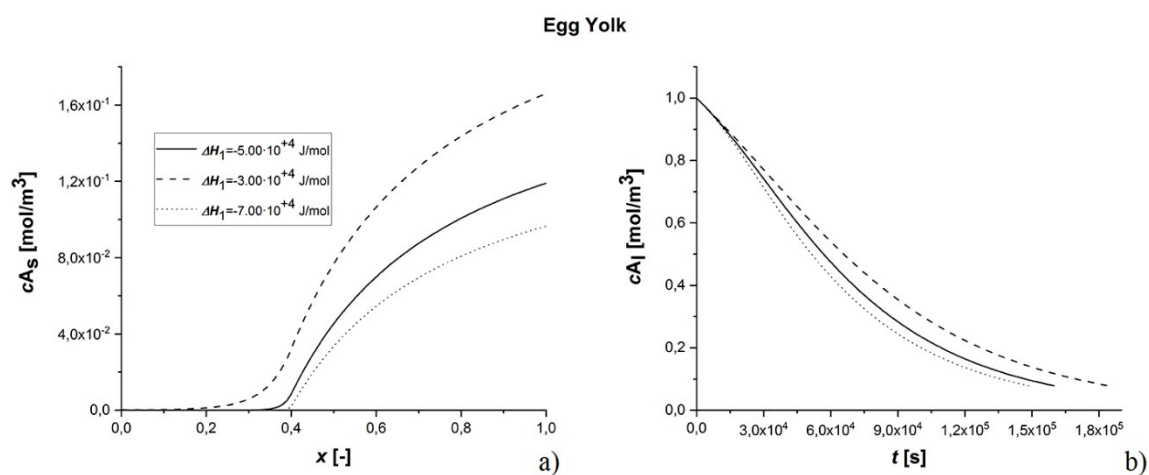

Figure S7. (a) Intraparticle profile of  $c_{As}$  at time  $t = 1.38 \cdot 10^5$  s. (b) Bulk profile of  $c_{Ai}$  over time.

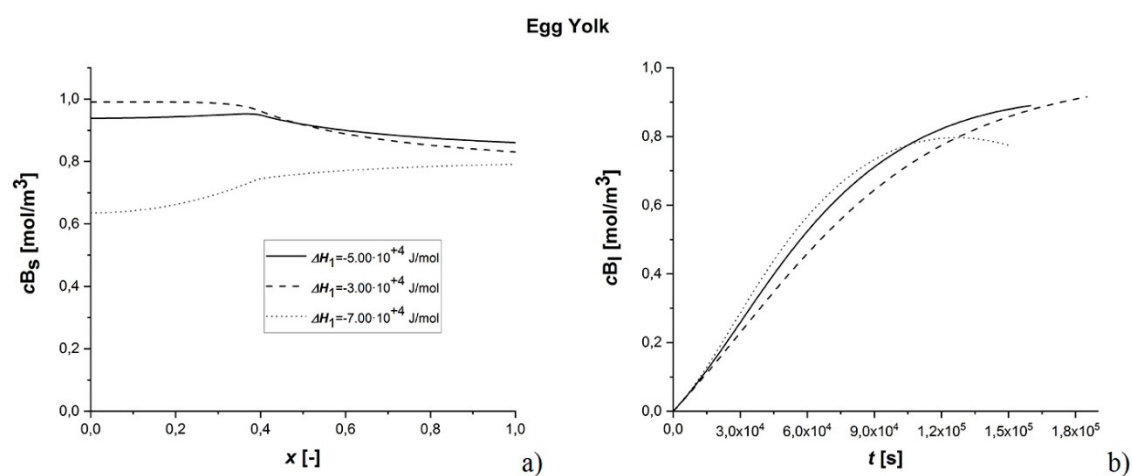

Figure S8. (a) Intraparticle profile of  $c_{Bs}$  at time  $t = 1.38 \cdot 10^5$  s. (b) Bulk profile of  $c_{Bi}$  over time.

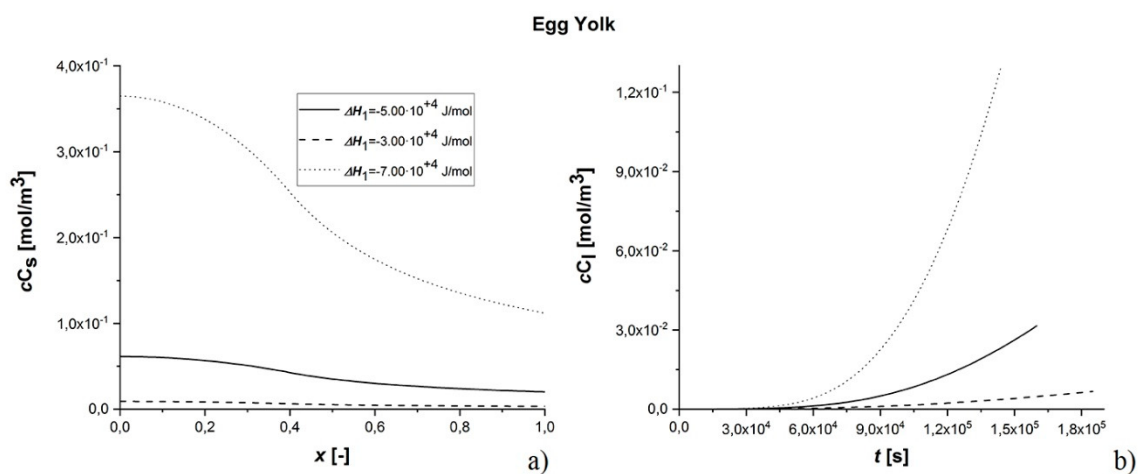

Figure S9. (a) Intraparticle profile of  $c_{Cs}$  at time  $t = 1.38 \cdot 10^5$  s. (b) Bulk profile of  $c_{Cl}$  over time.

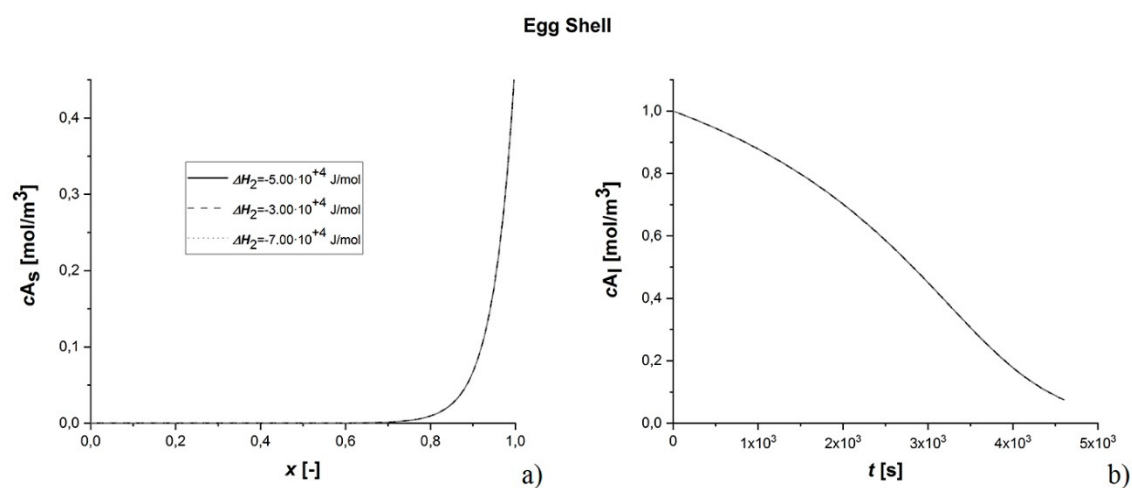

Figure S10. (a) Intraparticle profile of  $c_{As}$  at time  $t = 2.9 \cdot 10^3$  s. (b) Bulk profile of  $c_{Al}$  over time.

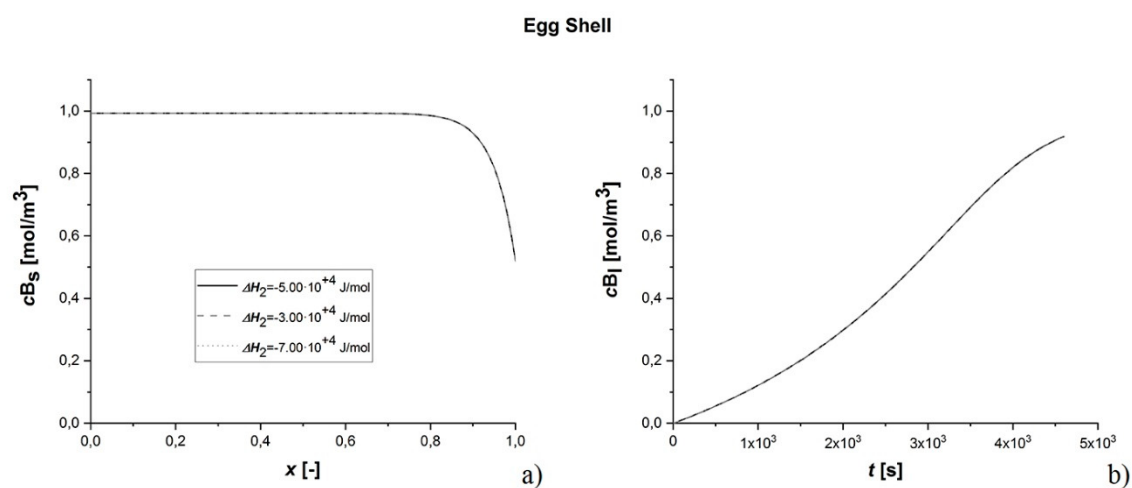

Figure S11. (a) Intraparticle profile of  $c_{Bs}$  at time  $t = 2.9 \cdot 10^3$  s. (b) Bulk profile of  $c_{Bl}$  over time.

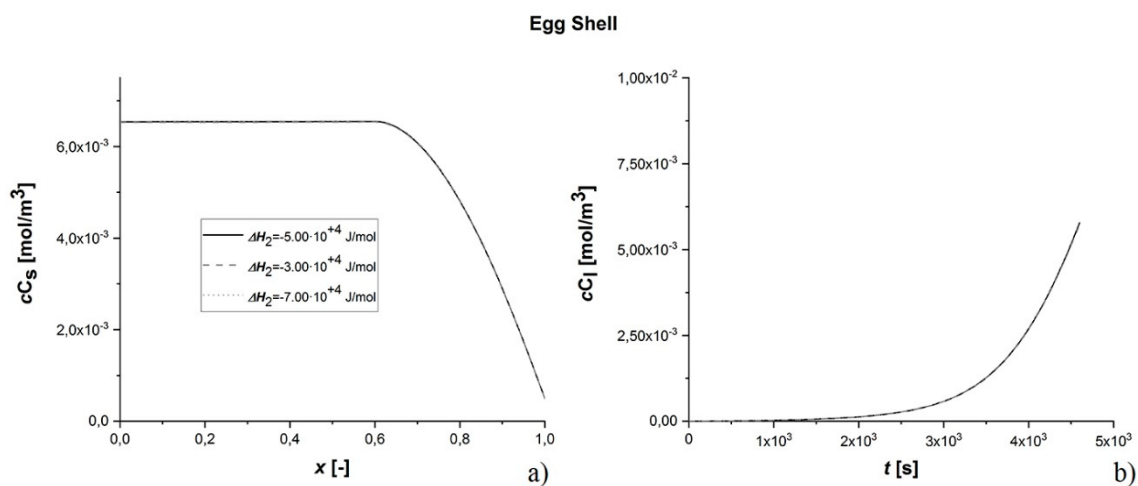

Figure S12. (a) Intraparticle profile of  $c_{Cs}$  at time  $t = 2.9 \cdot 10^3$  s. (b) Bulk profile of  $c_{Cl}$  over time.

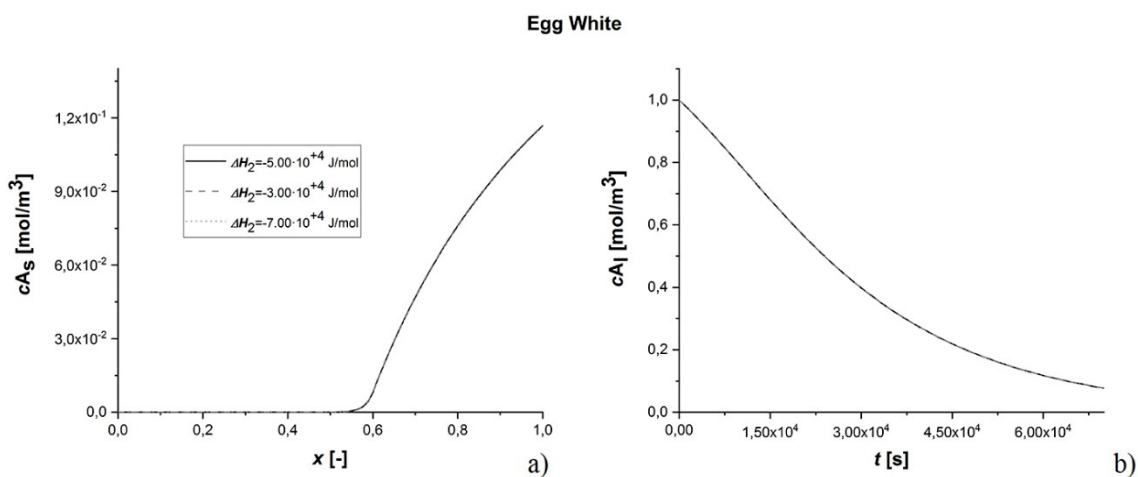

Figure S13. (a) Intraparticle profile of  $c_{As}$  at time  $t = 6.0 \cdot 10^4$  s. (b) Bulk profile of  $c_{Al}$  over time.

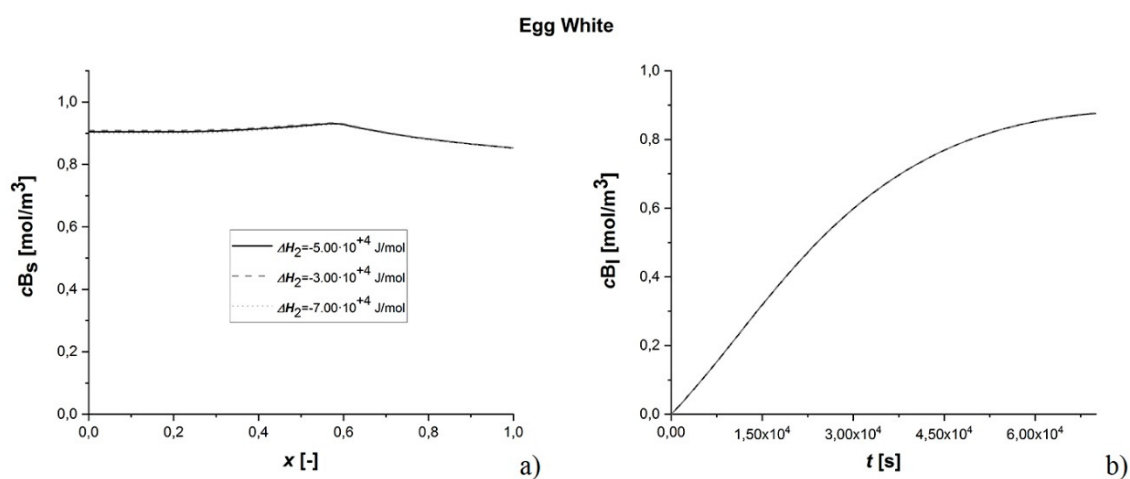

Figure S14. (a) Intraparticle profile of  $c_{Bs}$  at time  $t = 6.0 \cdot 10^4$  s. (b) Bulk profile of  $c_{Bl}$  over time.

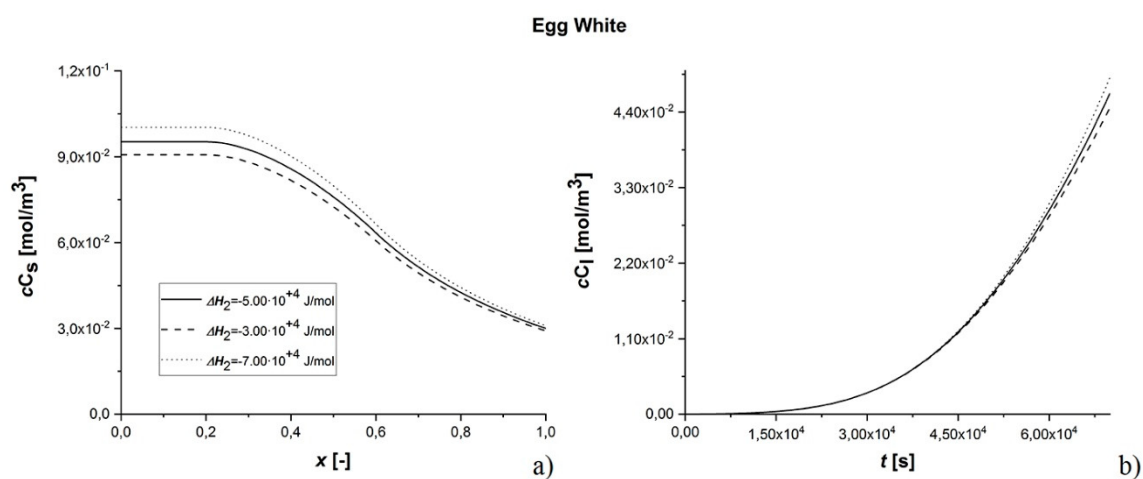

Figure S15. (a) Intraparticle profile of  $c_{Cs}$  at time  $t = 6.0 \cdot 10^4$  s. (b) Bulk profile of  $c_{Ci}$  over time.

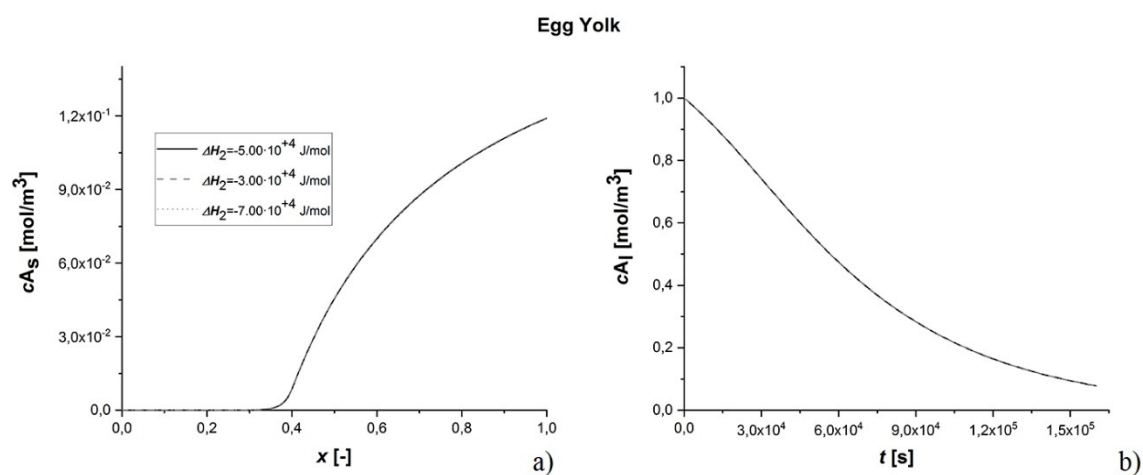

Figure S16. (a) Intraparticle profile of  $c_{As}$  at time  $t = 1.38 \cdot 10^5$  s. (b) Bulk profile of  $c_{Ai}$  over time.

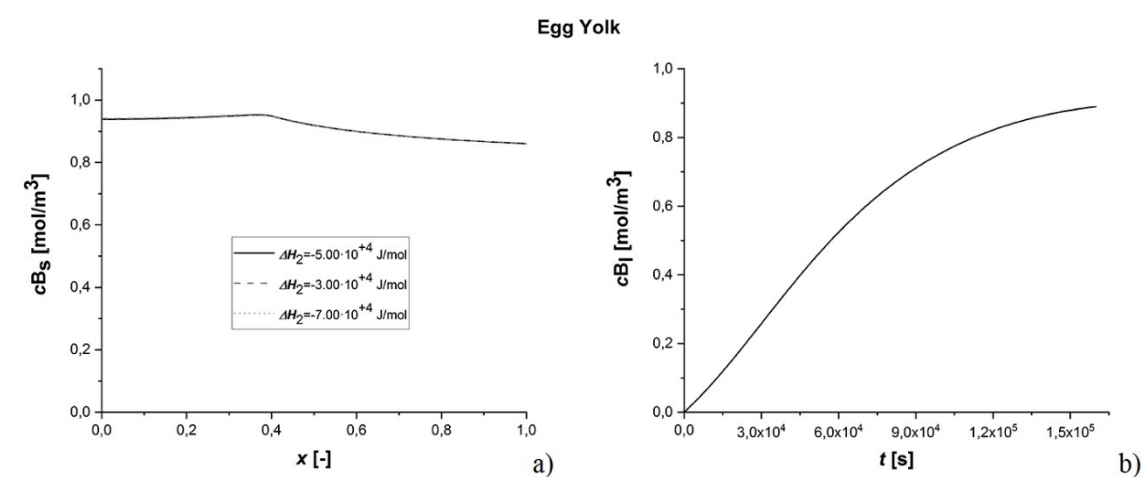

Figure S17. (a) Intraparticle profile of  $c_{Bs}$  at time  $t = 1.38 \cdot 10^5$  s. (b) Bulk profile of  $c_{Bi}$  over time.

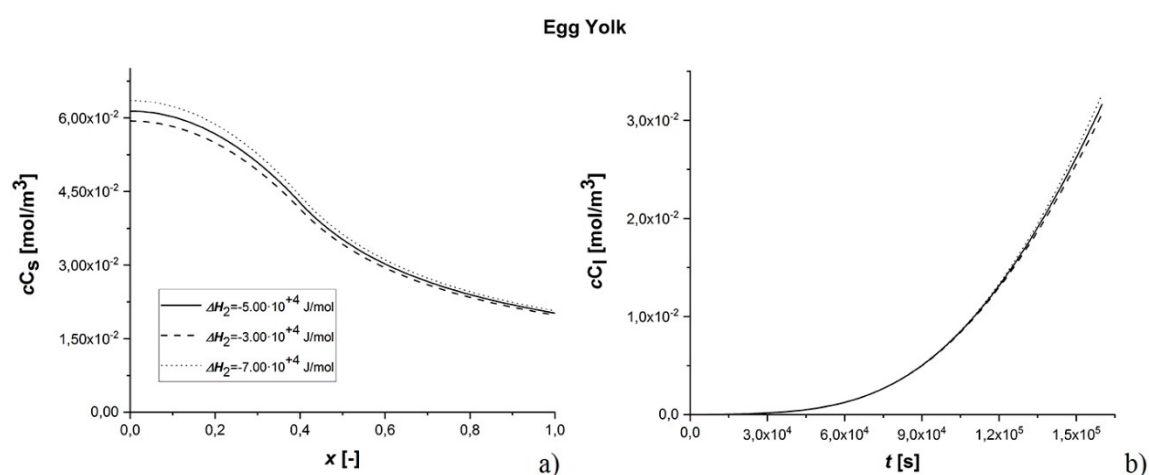

Figure S18. (a) Intraparticle profile of  $c_{Cs}$  at time  $t = 1.38 \cdot 10^5$  s. (b) Bulk profile of  $c_{Cl}$  over time.

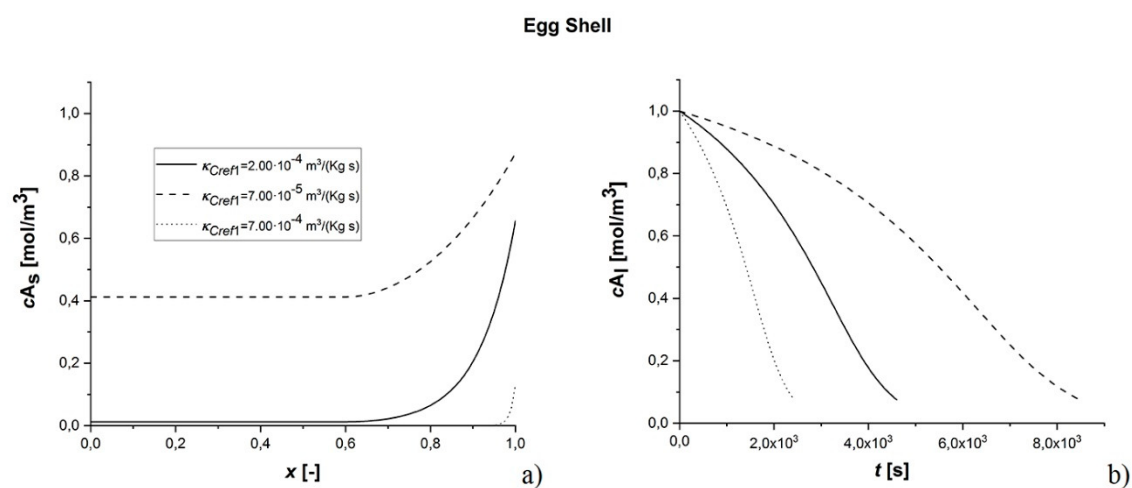

Figure S19. (a) Intraparticle profile of  $c_{As}$  at time  $t = 2.2 \cdot 10^3$  s. (b) Bulk profile of  $c_{Al}$  over time.

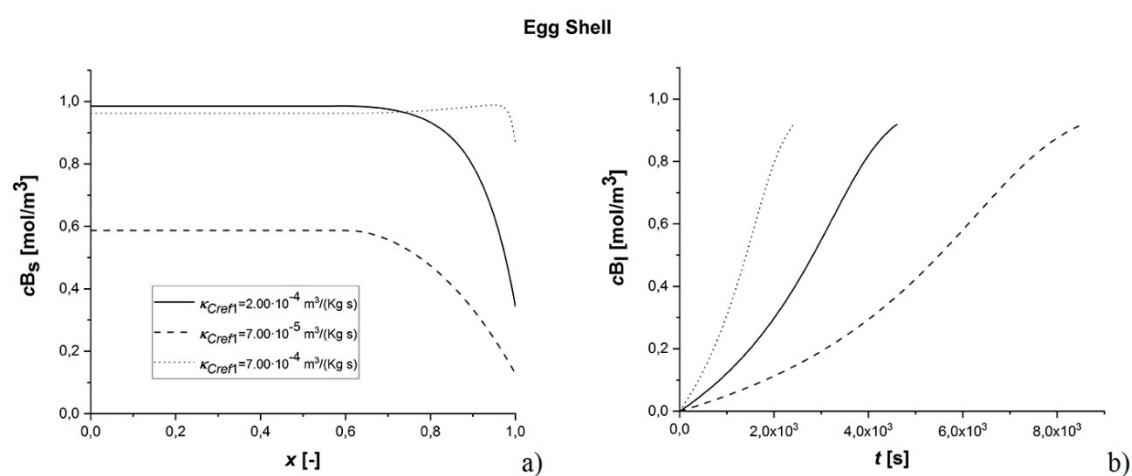

Figure S20. (a) Intraparticle profile of  $c_{Bs}$  at time  $t = 2.2 \cdot 10^3$  s. (b) Bulk profile of  $c_{Bl}$  over time.

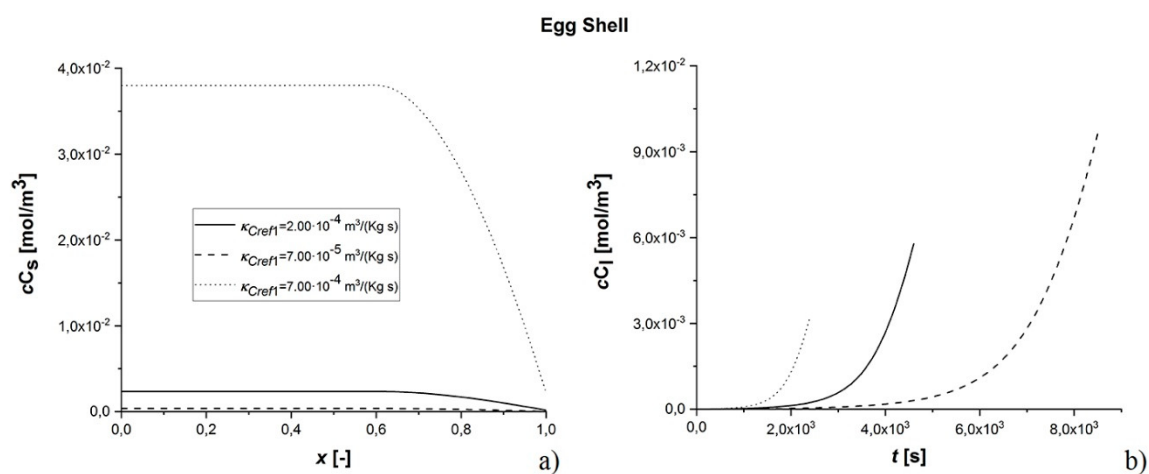

Figure S21. (a) Intraparticle profile of  $c_{Cs}$  at time  $t = 2.2 \cdot 10^3$  s. (b) Bulk profile of  $c_{Ci}$  over time.

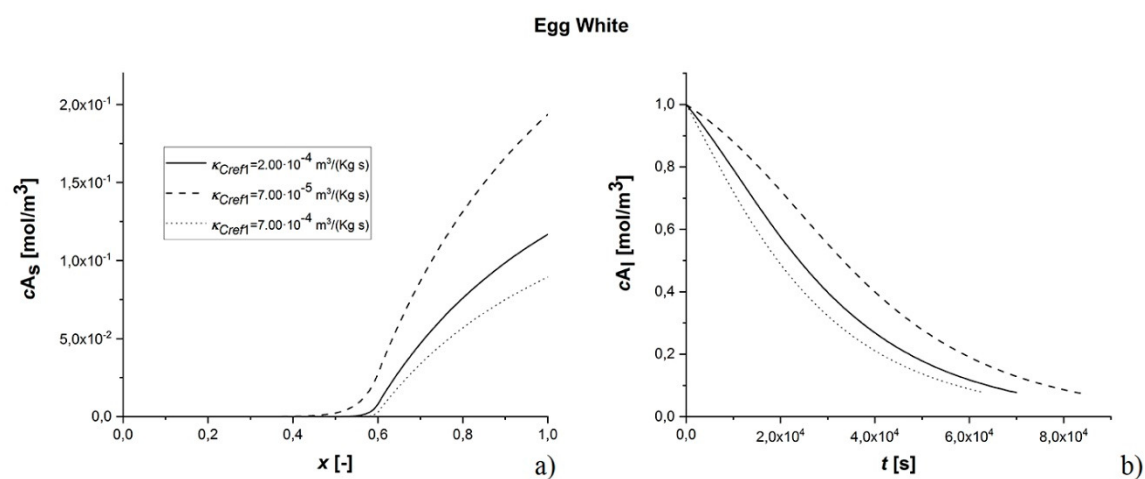

Figure S22. (a) Intraparticle profile of  $c_{As}$  at time  $t = 6.0 \cdot 10^4$  s. (b) Bulk profile of  $c_{Ai}$  over time.

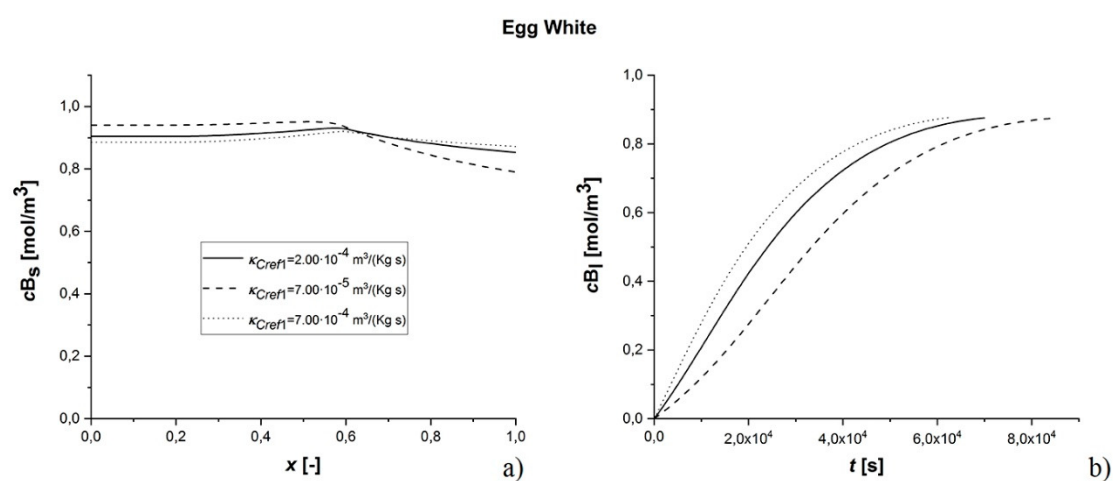

Figure S23. (a) Intraparticle profile of  $c_{Bs}$  at time  $t = 6.0 \cdot 10^4$  s. (b) Bulk profile of  $c_{Bi}$  over time.

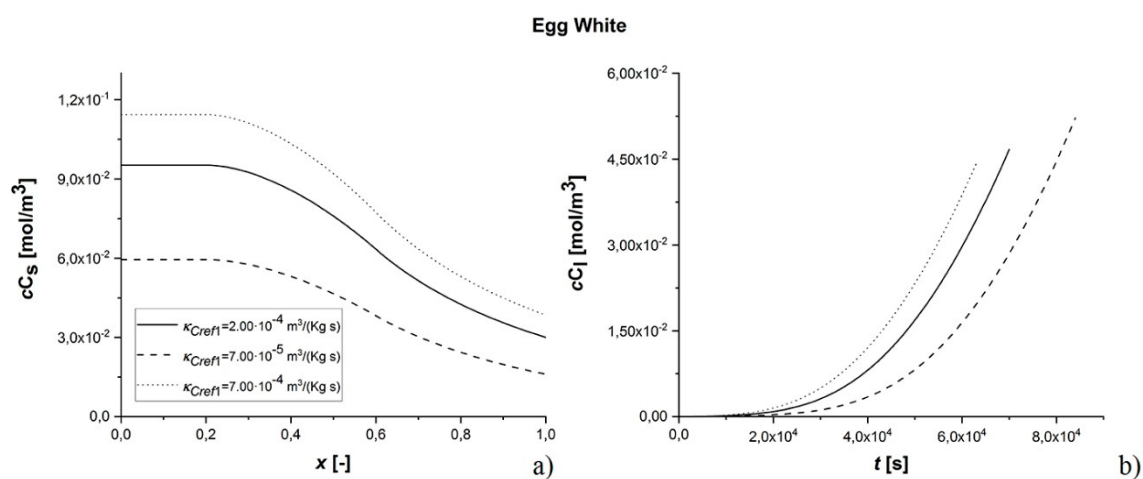

Figure S24. (a) Intraparticle profile of  $c_{Cs}$  at time  $t = 6.0 \cdot 10^4$  s. (b) Bulk profile of  $c_{Cl}$  over time.

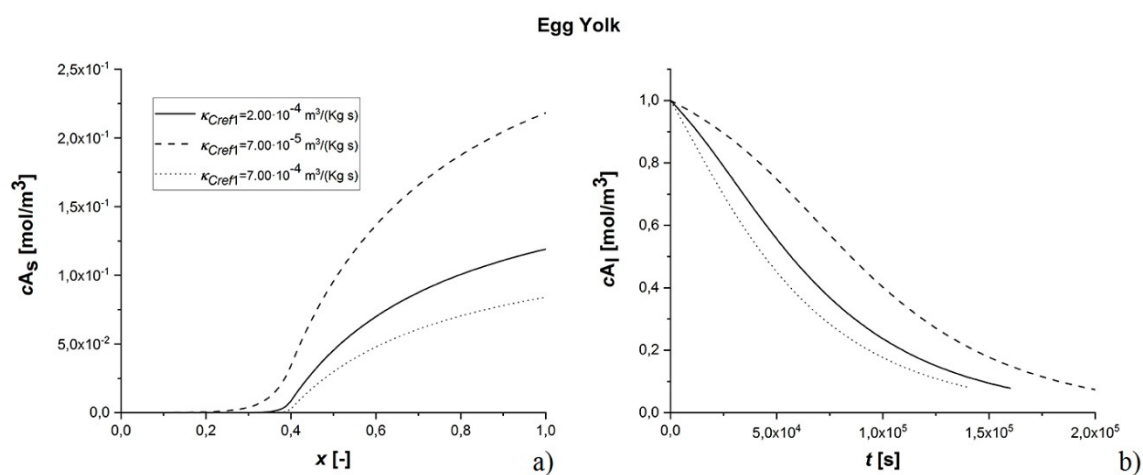

Figure S25. (a) Intraparticle profile of  $c_{As}$  at time  $t = 1.38 \cdot 10^5$  s. (b) Bulk profile of  $c_{Al}$  over time.

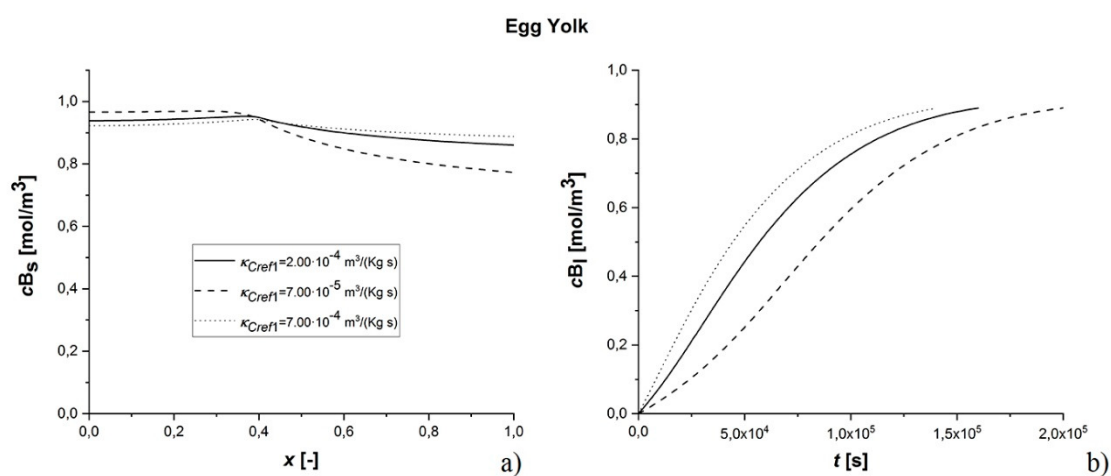

Figure S26. (a) Intraparticle profile of  $c_{Bs}$  at time  $t = 1.38 \cdot 10^5$  s. (b) Bulk profile of  $c_{Bl}$  over time.

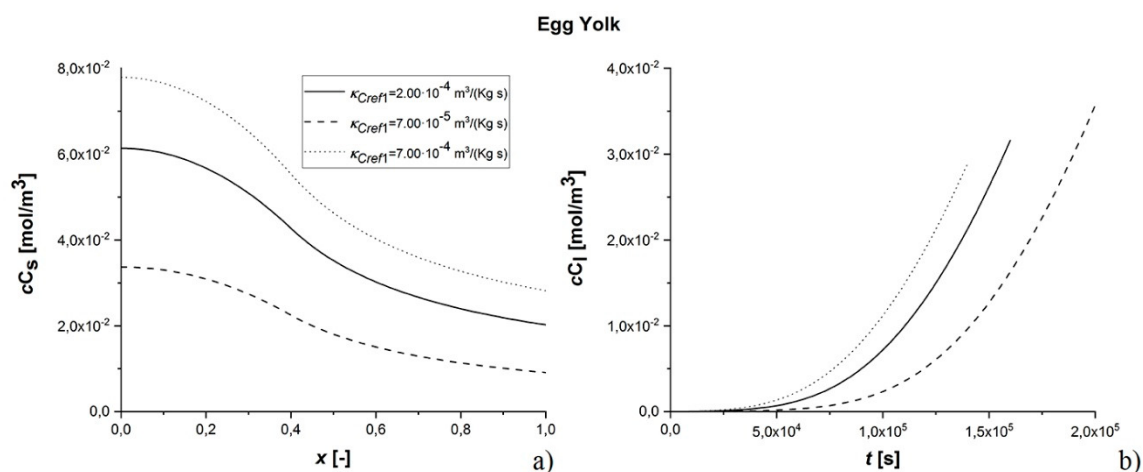

Figure S27. (a) Intraparticle profile of  $c_{Cs}$  at time  $t = 1.38 \cdot 10^5$  s. (b) Bulk profile of  $c_{Cl}$  over time.

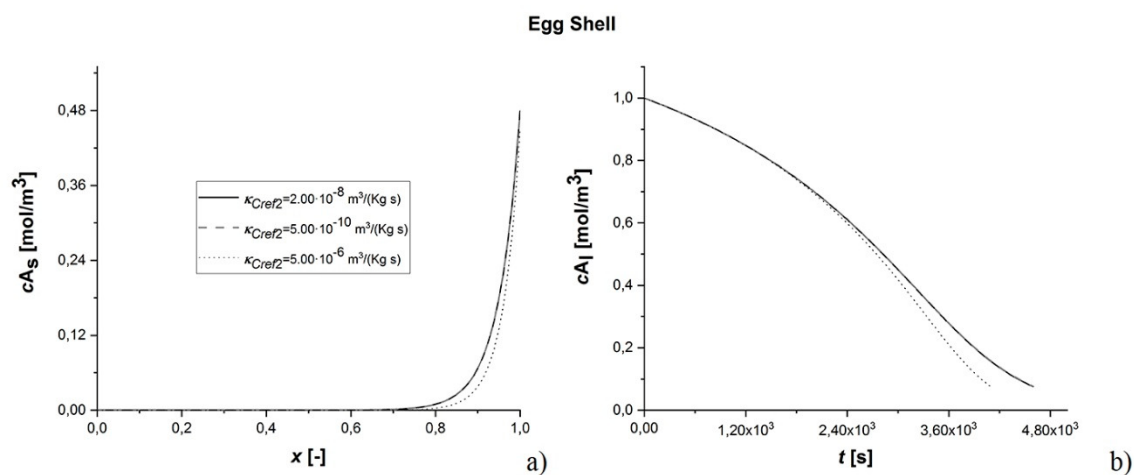

Figure S28. (a) Intraparticle profile of  $c_{As}$  at time  $t = 2.9 \cdot 10^3$  s. (b) Bulk profile of  $c_{Al}$  over time.

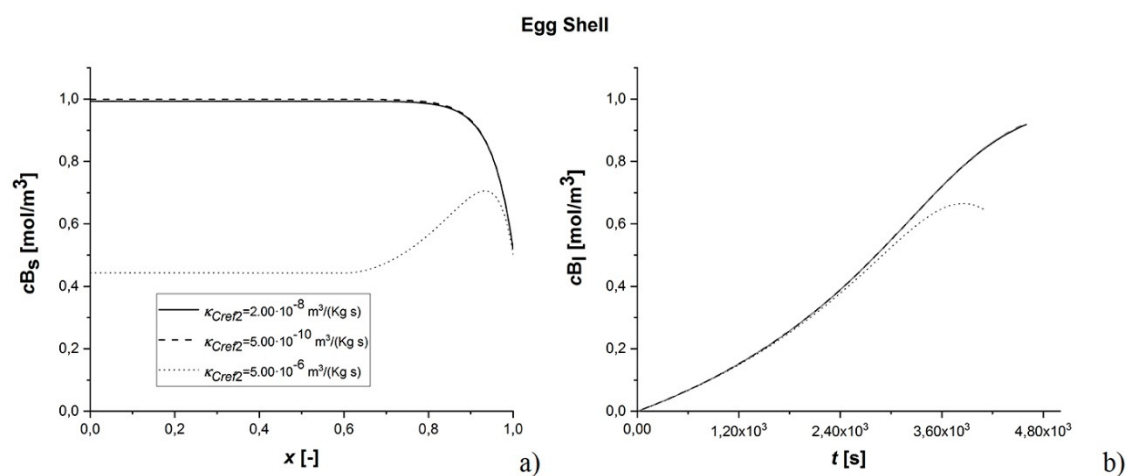

Figure S29. (a) Intraparticle profile of  $c_{Bs}$  at time  $t = 2.9 \cdot 10^3$  s. (b) Bulk profile of  $c_{Bl}$  over time.

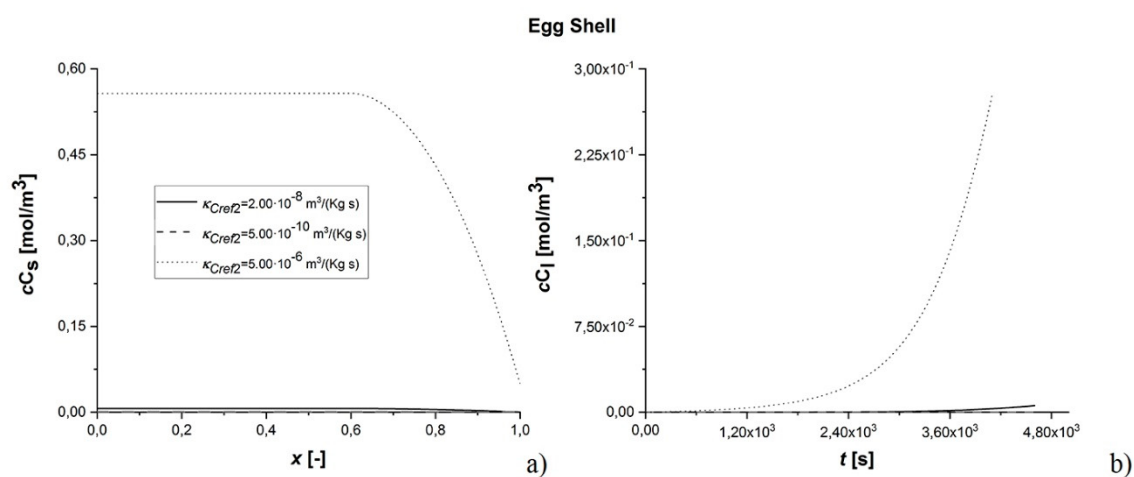

Figure S30. (a) Intraparticle profile of  $c_{Cs}$  at time  $t = 2.9 \cdot 10^3$  s. (b) Bulk profile of  $c_{Ci}$  over time.

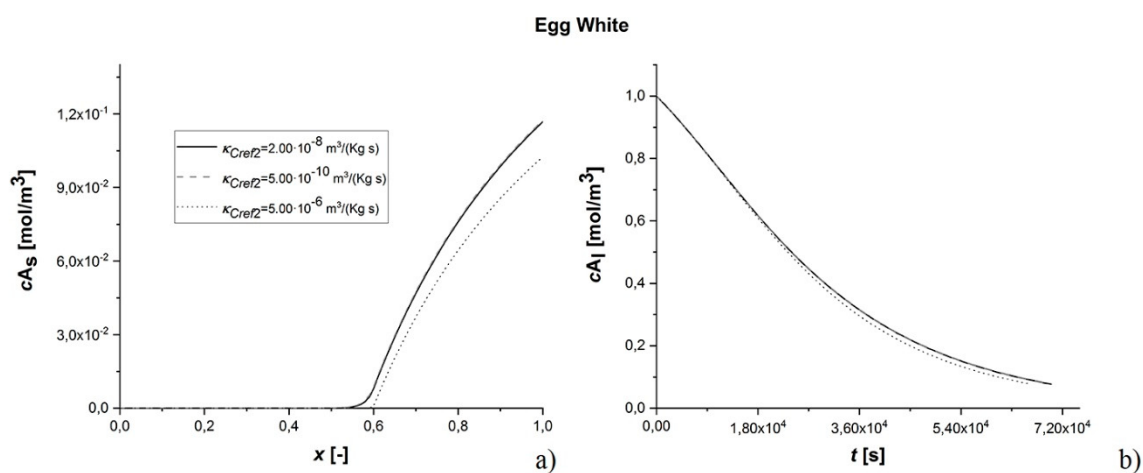

Figure S31. (a) Intraparticle profile of  $c_{As}$  at time  $t = 6.0 \cdot 10^4$  s. (b) Bulk profile of  $c_{Ai}$  over time.

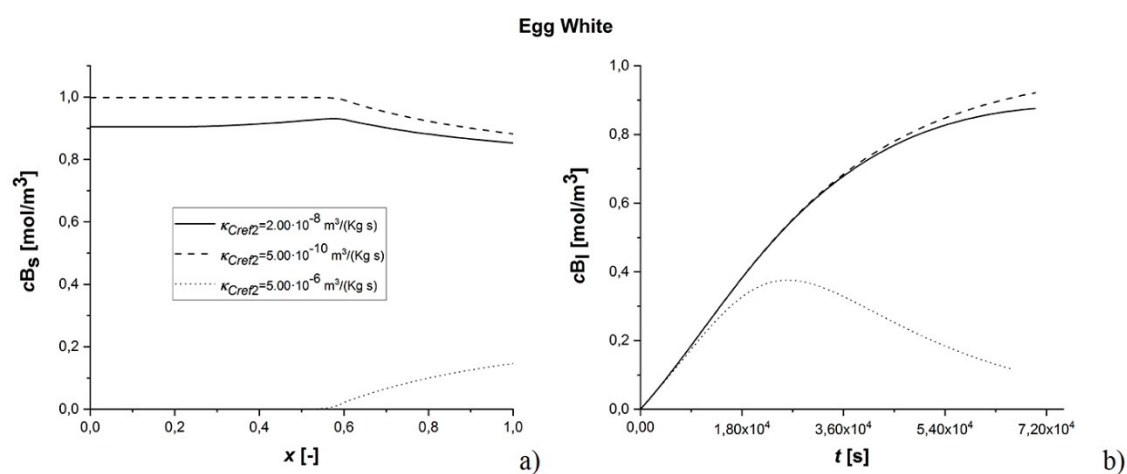

Figure S32. (a) Intraparticle profile of  $c_{Bs}$  at time  $t = 6.0 \cdot 10^4$  s. (b) Bulk profile of  $c_{Bi}$  over time.

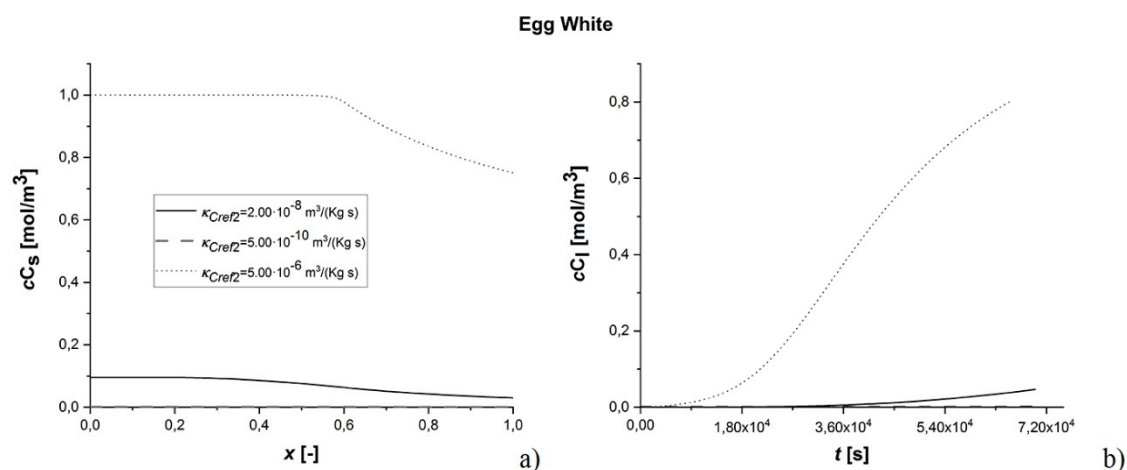

Figure S33. (a) Intraparticle profile of  $c_{Cs}$  at time  $t = 6.0 \cdot 10^4$  s. (b) Bulk profile of  $c_{Cl}$  over time.

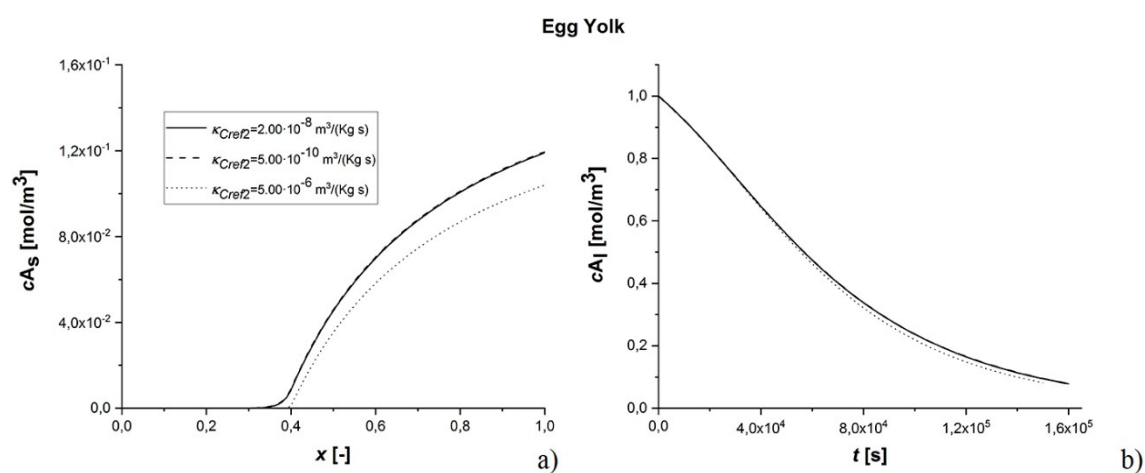

Figure S34. (a) Intraparticle profile of  $c_{As}$  at time  $t = 1.38 \cdot 10^5$  s. (b) Bulk profile of  $c_{Al}$  over time.

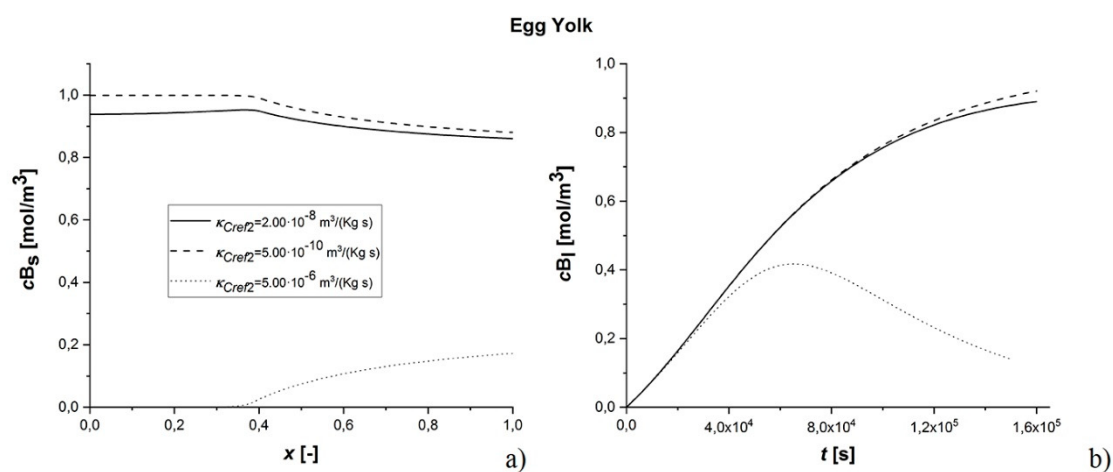

Figure S35. (a) Intraparticle profile of  $c_{Bs}$  at time  $t = 1.38 \cdot 10^5$  s. (b) Bulk profile of  $c_{Bl}$  over time.

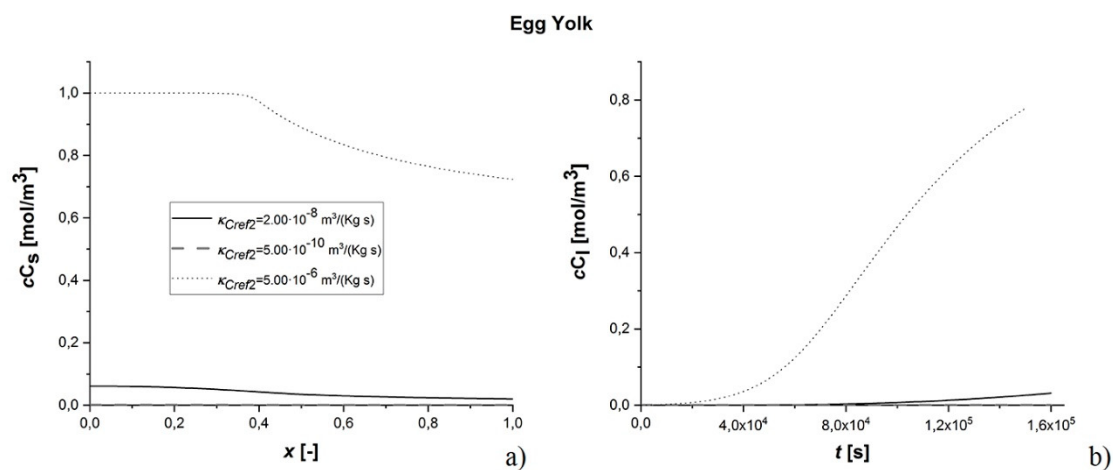

Figure S36. (a) Intraparticle profile of  $c_{Cs}$  at time  $t = 1.38 \cdot 10^5$  s. (b) Bulk profile of  $c_{Cl}$  over time.

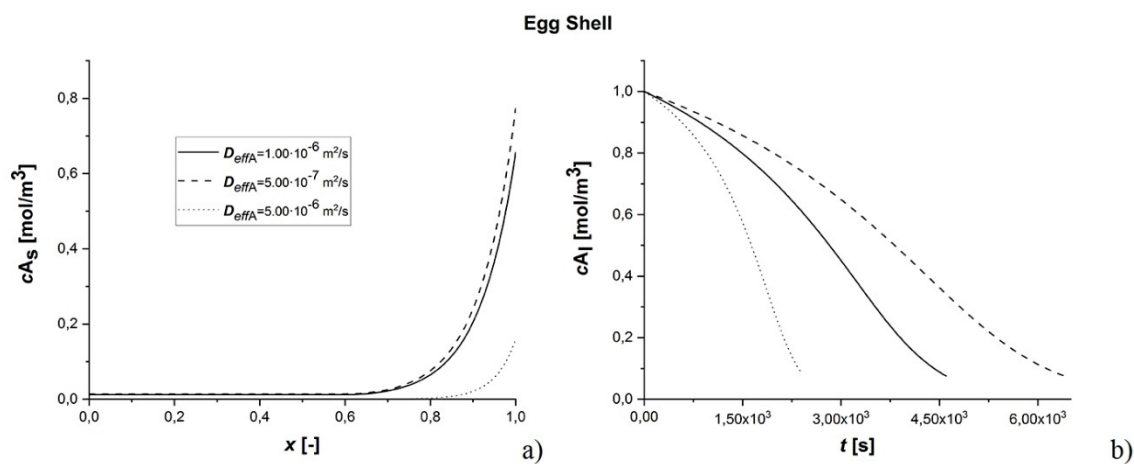

Figure S37. (a) Intraparticle profile of  $c_{As}$  at time  $t = 2.2 \cdot 10^3$  s. (b) Bulk profile of  $c_{Al}$  over time.

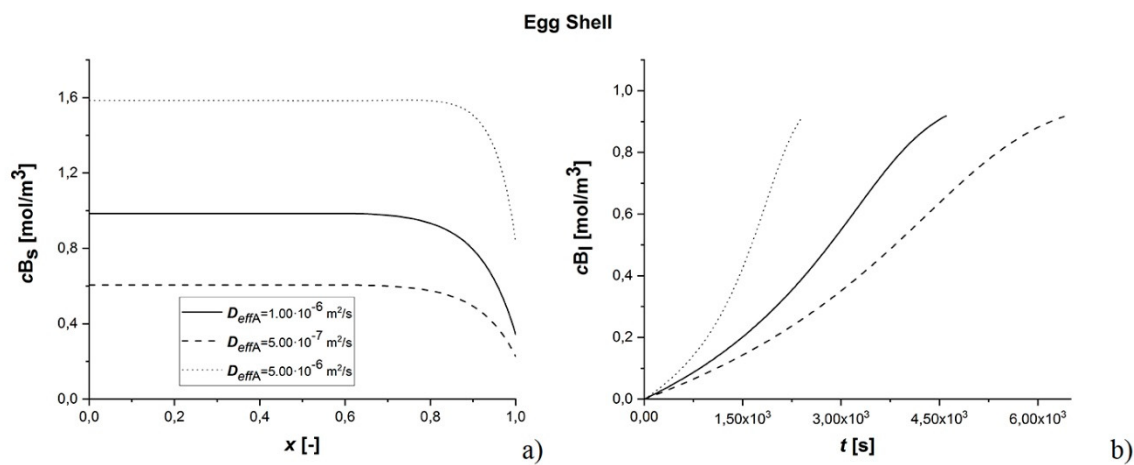

Figure S38. (a) Intraparticle profile of  $c_{Bs}$  at time  $t = 2.2 \cdot 10^3$  s. (b) Bulk profile of  $c_{Bl}$  over time.

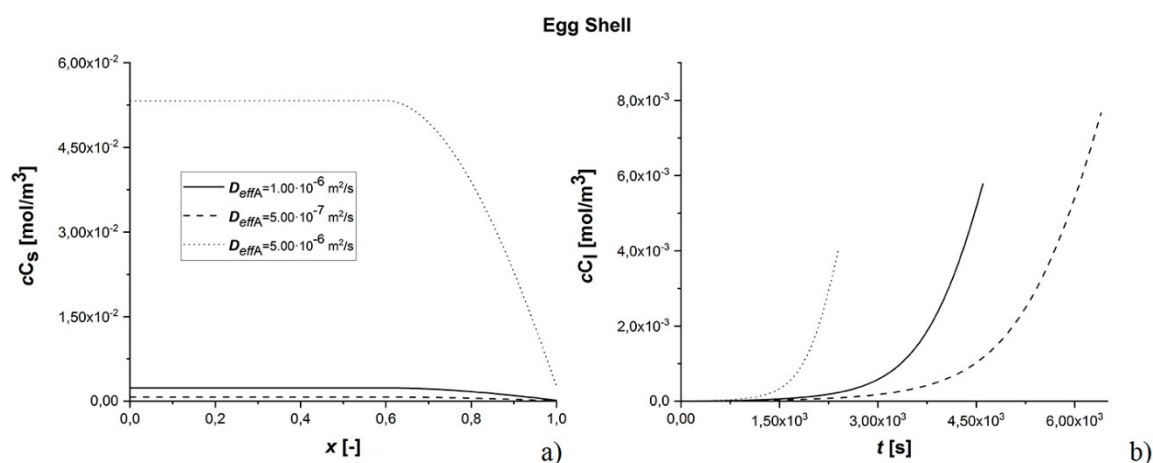

Figure S39. (a) Intraparticle profile of  $c_{Cs}$  at time  $t = 2.2 \cdot 10^3$  s. (b) Bulk profile of  $c_{Cl}$  over time.

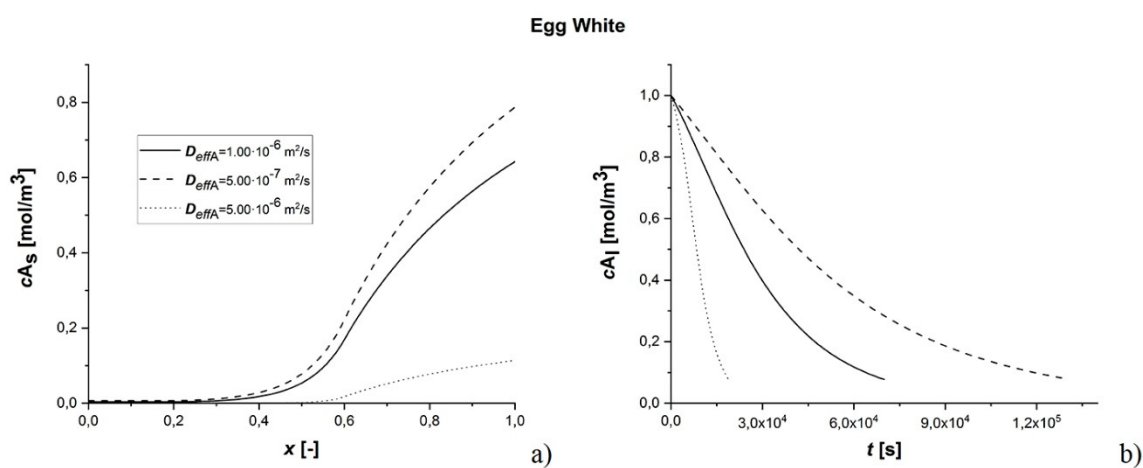

Figure S40. (a) Intraparticle profile of  $c_{As}$  at time  $t = 1.7 \cdot 10^4$  s. (b) Bulk profile of  $c_{Al}$  over time.

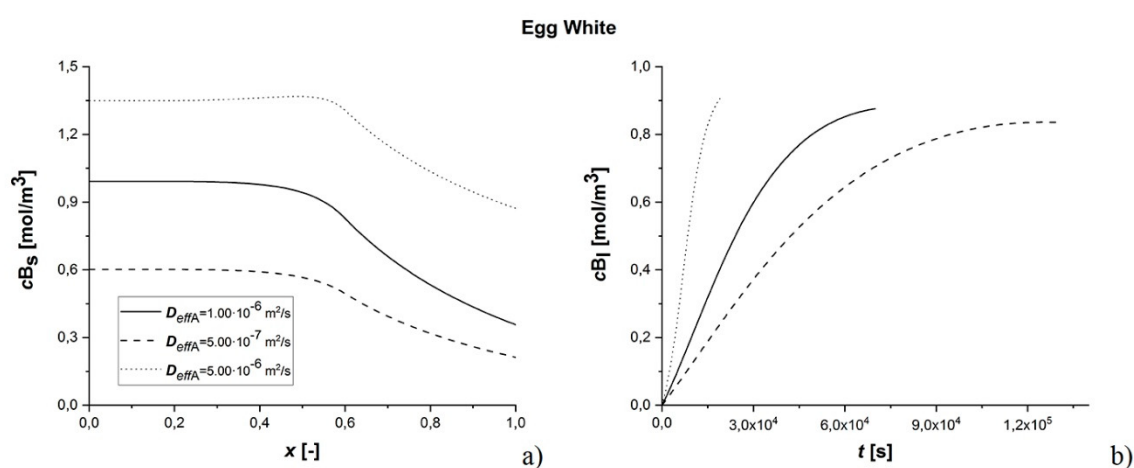

Figure S41. (a) Intraparticle profile of  $c_{Bs}$  at time  $t = 1.7 \cdot 10^4$  s. (b) Bulk profile of  $c_{Bl}$  over time.

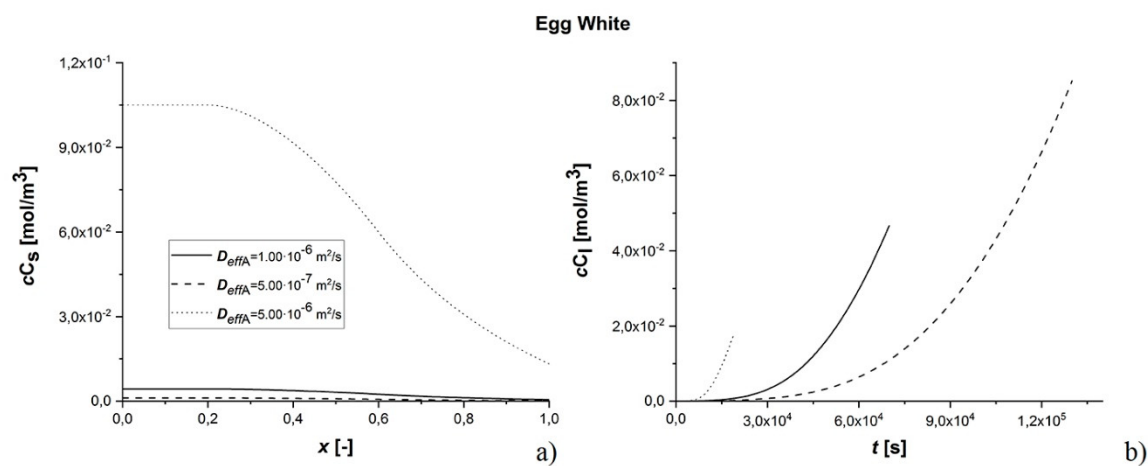

Figure S42. (a) Intraparticle profile of  $c_{Cs}$  at time  $t = 1.7 \cdot 10^4$  s. (b) Bulk profile of  $c_{CI}$  over time.

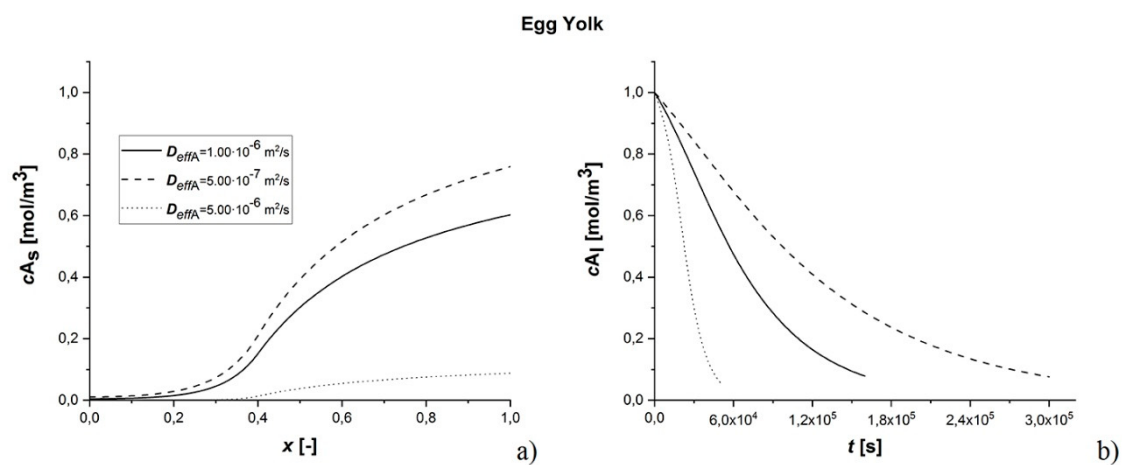

Figure S43. (a) Intraparticle profile of  $c_{As}$  at time  $t = 4.5 \cdot 10^4$  s. (b) Bulk profile of  $c_{AI}$  over time.

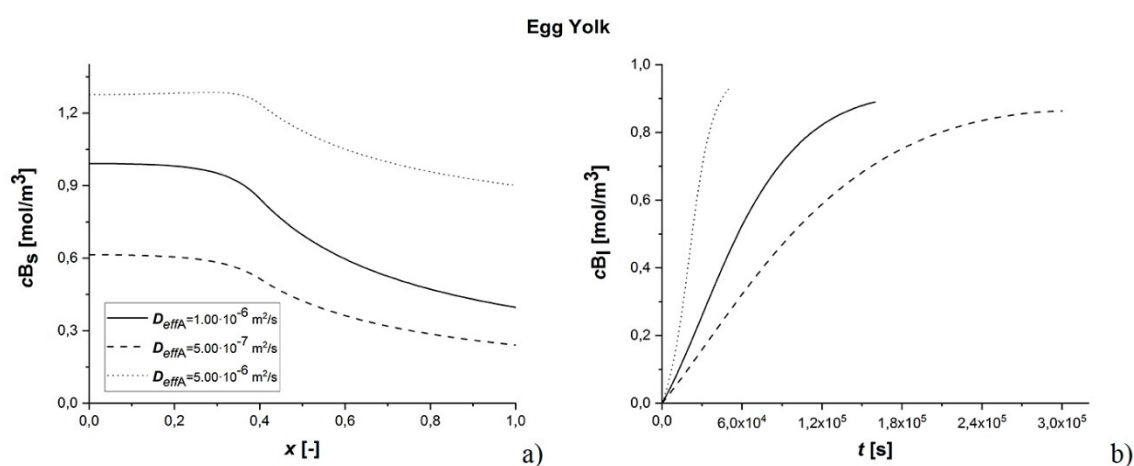

Figure S44. (a) Intraparticle profile of  $c_{Bs}$  at time  $t = 4.5 \cdot 10^4$  s. (b) Bulk profile of  $c_{BI}$  over time.

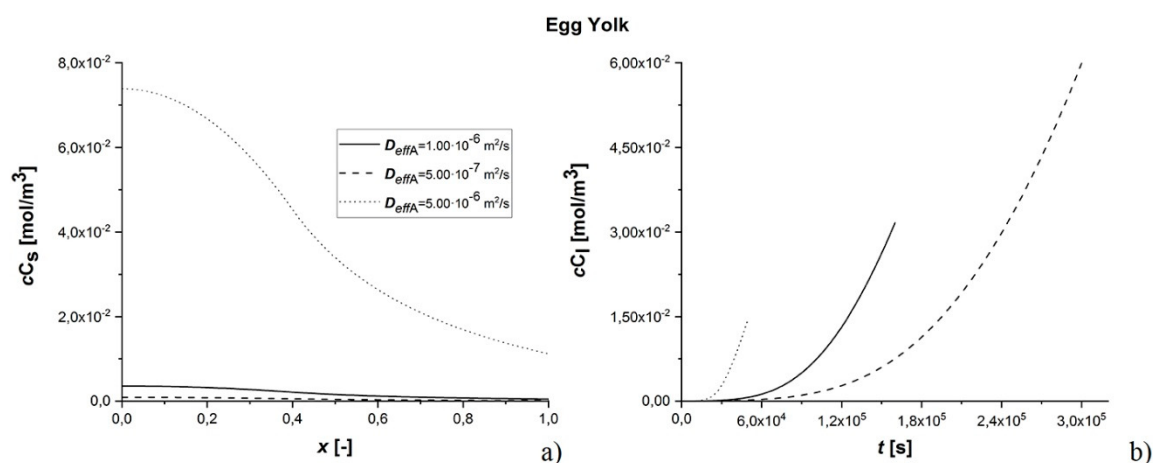

Figure S45. (a) Intraparticle profile of  $c_{Cs}$  at time  $t = 4.5 \cdot 10^4$  s. (b) Bulk profile of  $c_{Cl}$  over time.

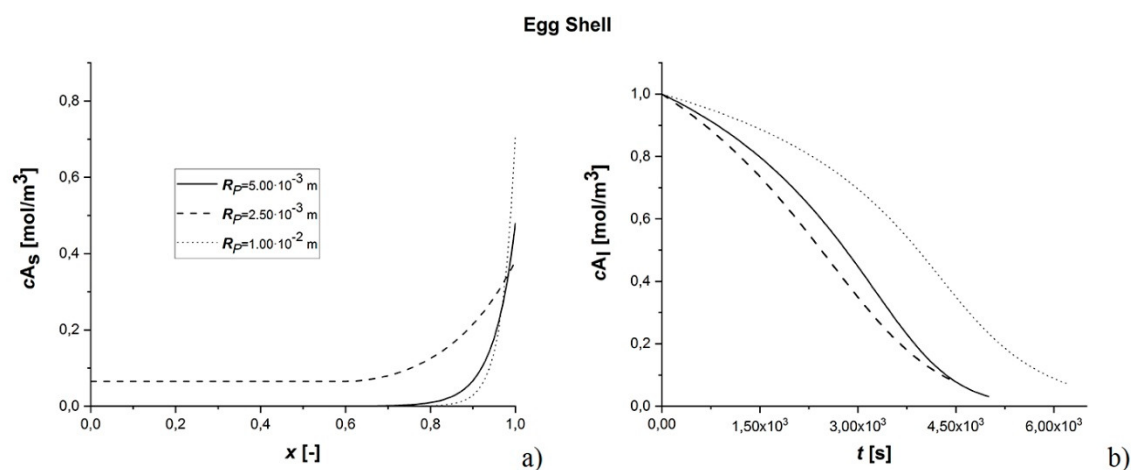

Figure S46. (a) Intraparticle profile of  $c_{As}$  at time  $t = 2.9 \cdot 10^3$  s. (b) Bulk profile of  $c_{Al}$  over time.

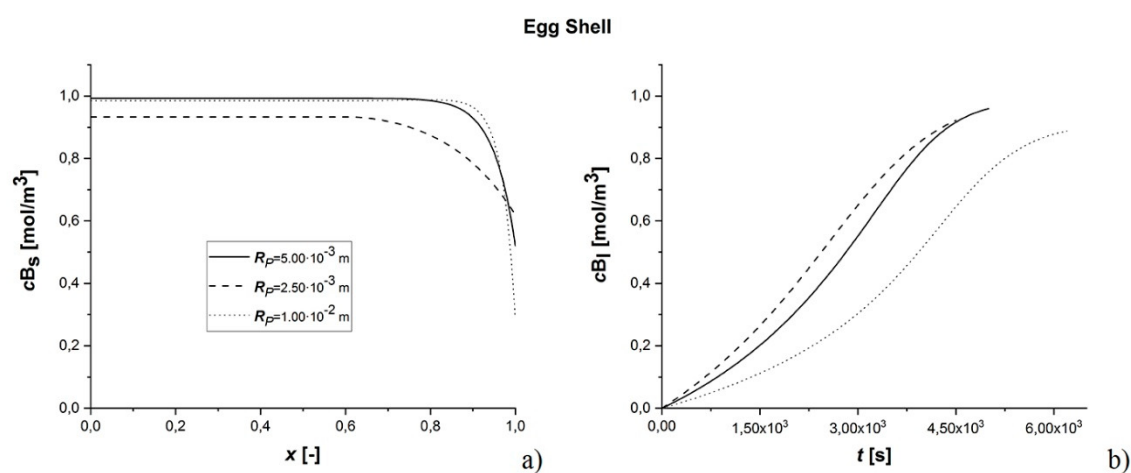

Figure S47. (a) Intraparticle profile of  $c_{Bs}$  at time  $t = 2.9 \cdot 10^3$  s. (b) Bulk profile of  $c_{Bl}$  over time.

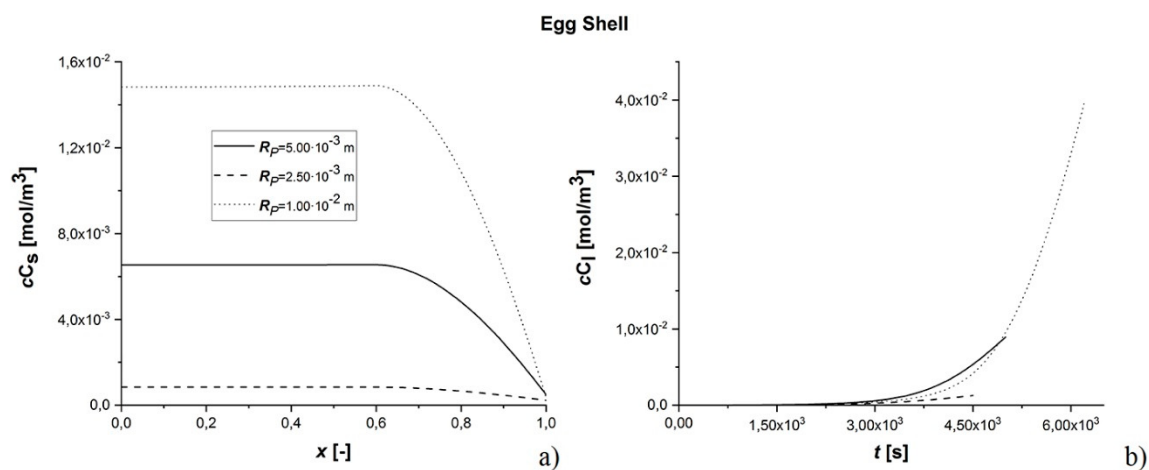

Figure S48. (a) Intraparticle profile of  $c_{Cs}$  at time  $t = 2.9 \cdot 10^3$  s. (b) Bulk profile of  $c_{Cl}$  over time.

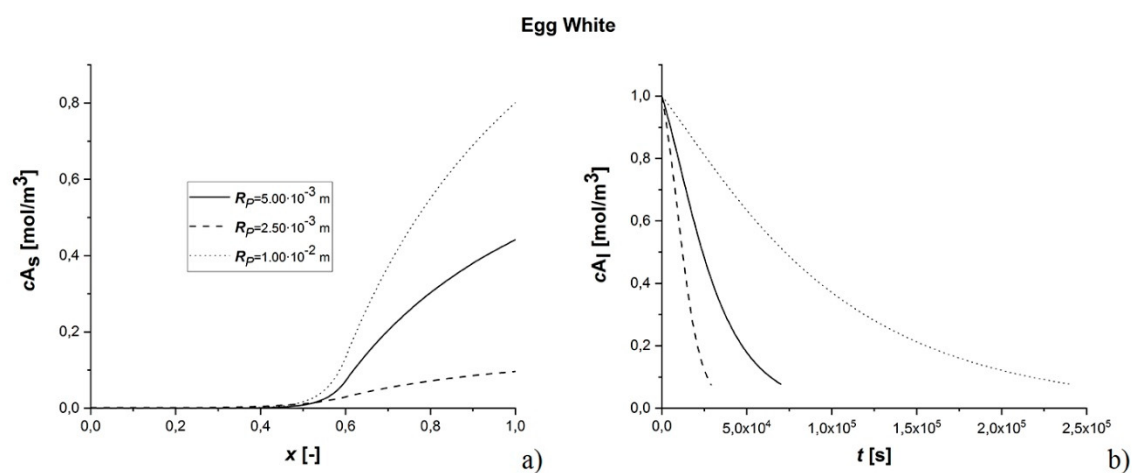

Figure S49. (a) Intraparticle profile of  $c_{As}$  at time  $t = 2.7 \cdot 10^4$  s. (b) Bulk profile of  $c_{Al}$  over time.

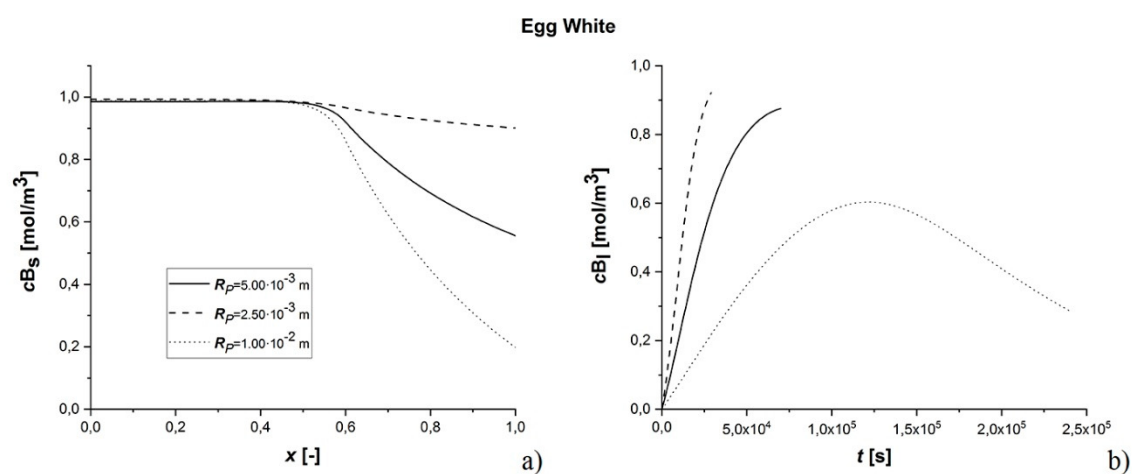

Figure S50. (a) Intraparticle profile of  $c_{Bs}$  at time  $t = 2.7 \cdot 10^4$  s. (b) Bulk profile of  $c_{Bl}$  over time.

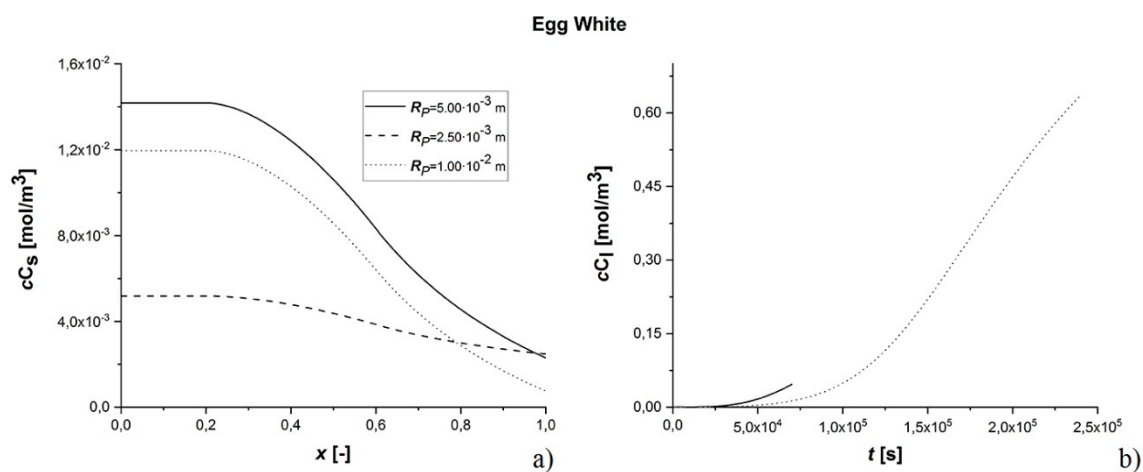

Figure S51. (a) Intraparticle profile of  $c_{Cs}$  at time  $t = 2.7 \cdot 10^4$  s. (b) Bulk profile of  $c_{Cl}$  over time.

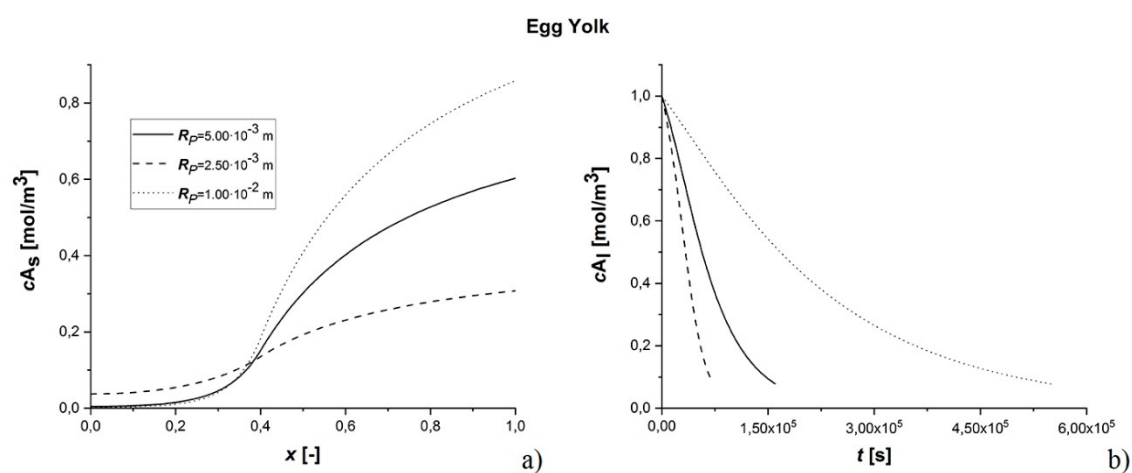

Figure S52. (a) Intraparticle profile of  $c_{As}$  at time  $t = 4.5 \cdot 10^4$  s. (b) Bulk profile of  $c_{Al}$  over time.

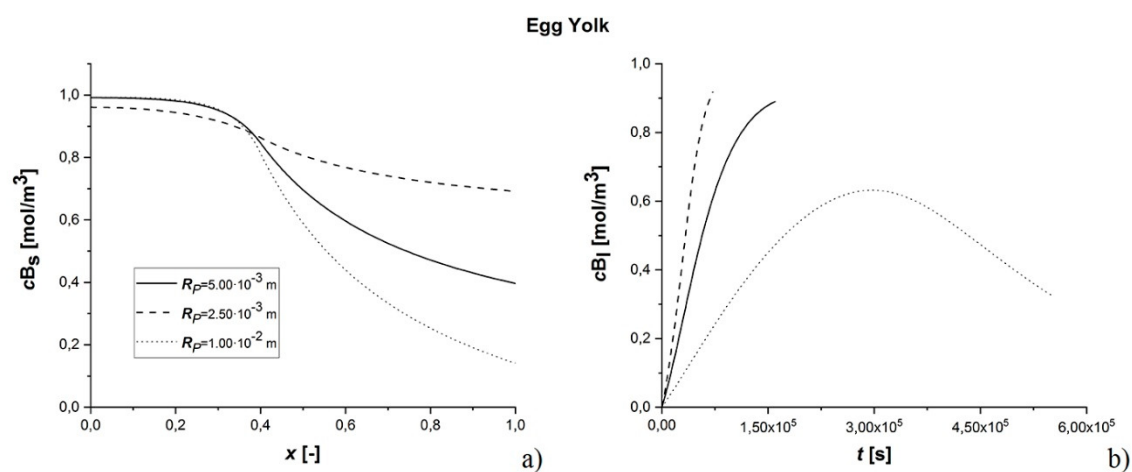

Figure S53. (a) Intraparticle profile of  $c_{Bs}$  at time  $t = 4.5 \cdot 10^4$  s. (b) Bulk profile of  $c_{Bl}$  over time.

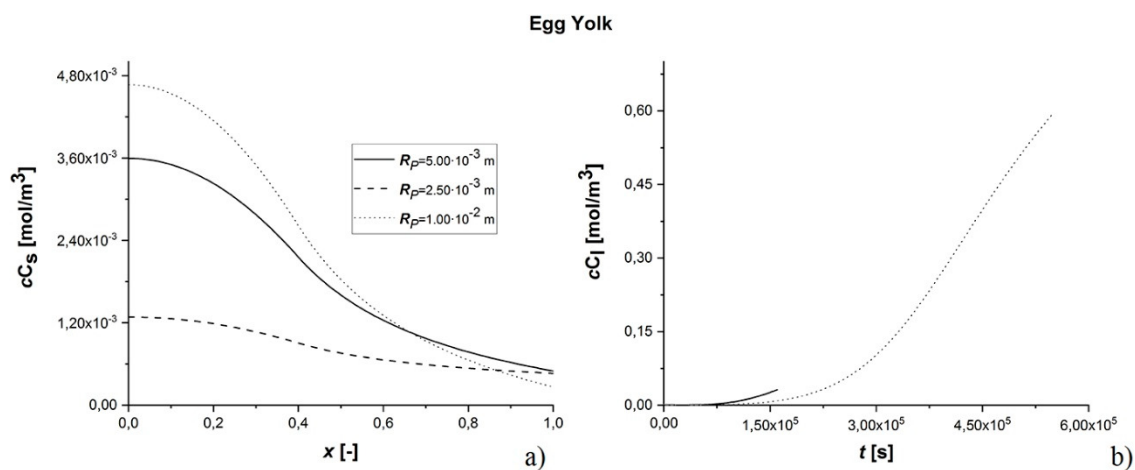

Figure S54. (a) Intraparticle profile of  $c_{Cs}$  at time  $t = 4.5 \cdot 10^4$  s. (b) Bulk profile of  $c_{Ci}$  over time.

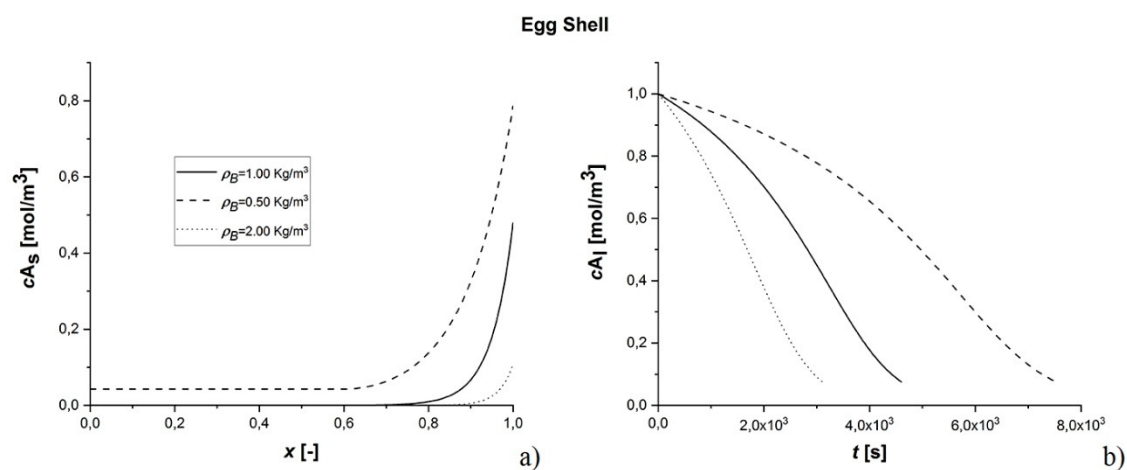

Figure S55. (a) Intraparticle profile of  $c_{As}$  at time  $t = 2.9 \cdot 10^3$  s. (b) Bulk profile of  $c_{Ai}$  over time.

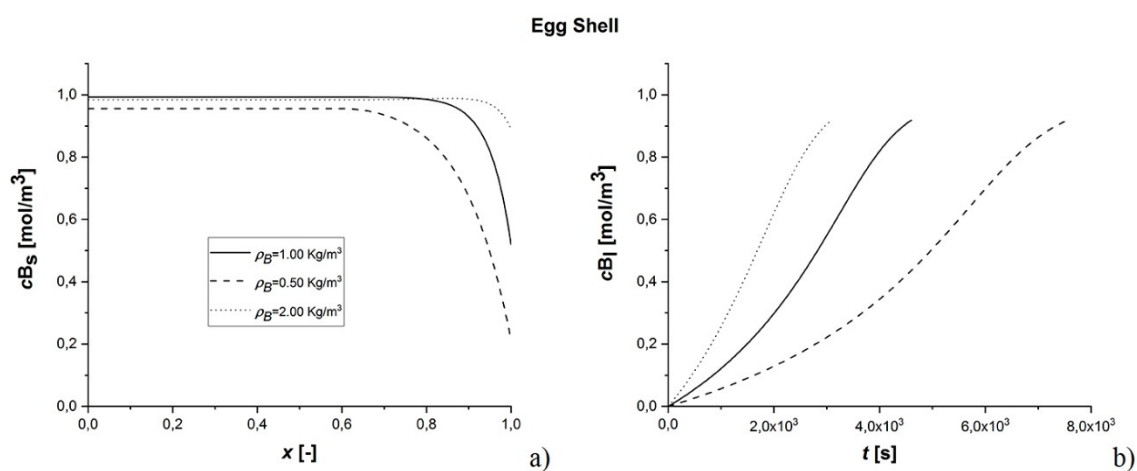

Figure S56. (a) Intraparticle profile of  $c_{Bs}$  at time  $t = 2.9 \cdot 10^3$  s. (b) Bulk profile of  $c_{Bi}$  over time.

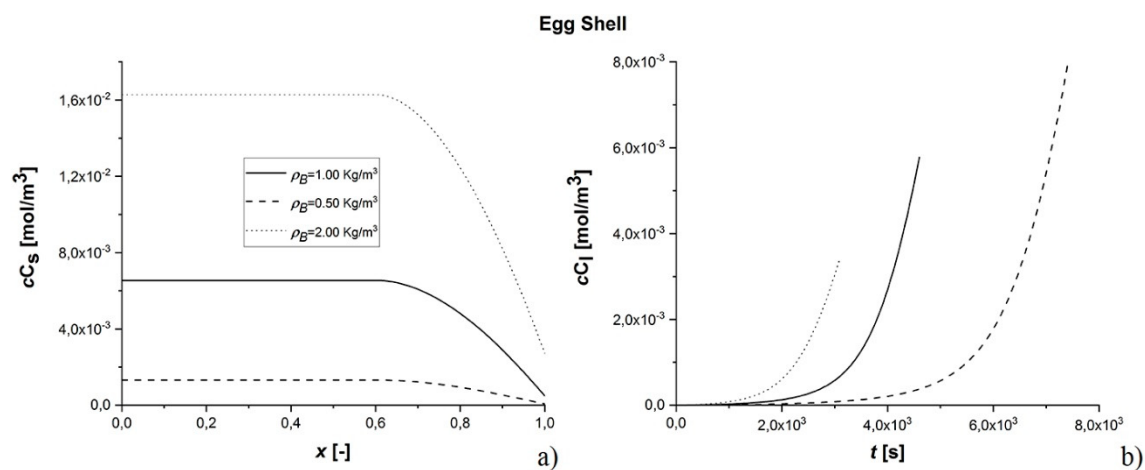

Figure S57. (a) Intraparticle profile of  $c_{Cs}$  at time  $t = 2.9 \cdot 10^3$  s. (b) Bulk profile of  $c_{Ci}$  over time.

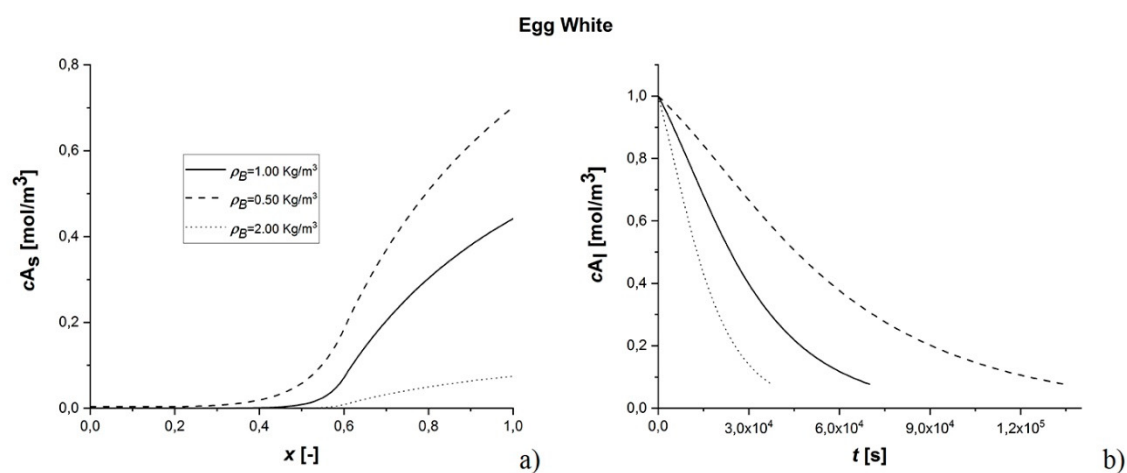

Figure S58. (a) Intraparticle profile of  $c_{As}$  at time  $t = 2.7 \cdot 10^4$  s. (b) Bulk profile of  $c_{Ai}$  over time.

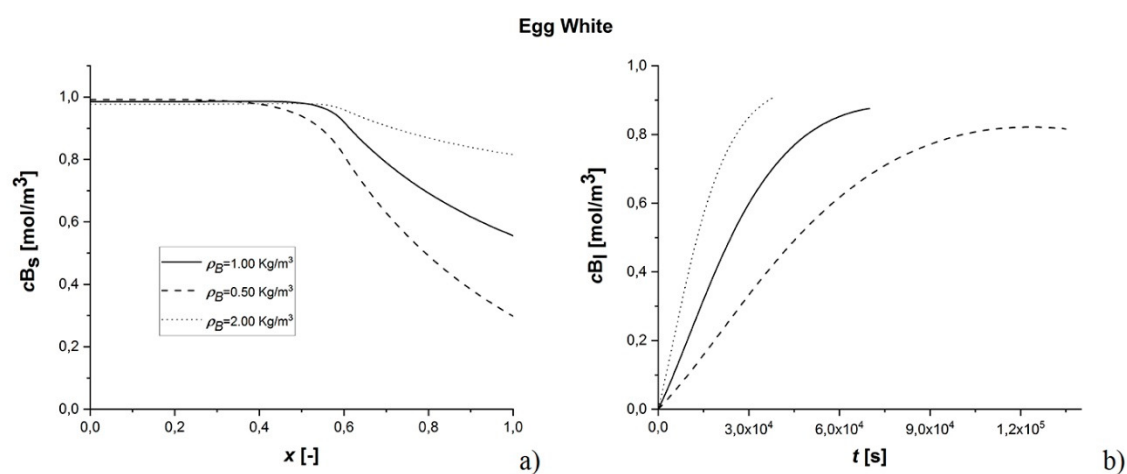

Figure S59. (a) Intraparticle profile of  $c_{Bs}$  at time  $t = 2.7 \cdot 10^4$  s. (b) Bulk profile of  $c_{Bi}$  over time.

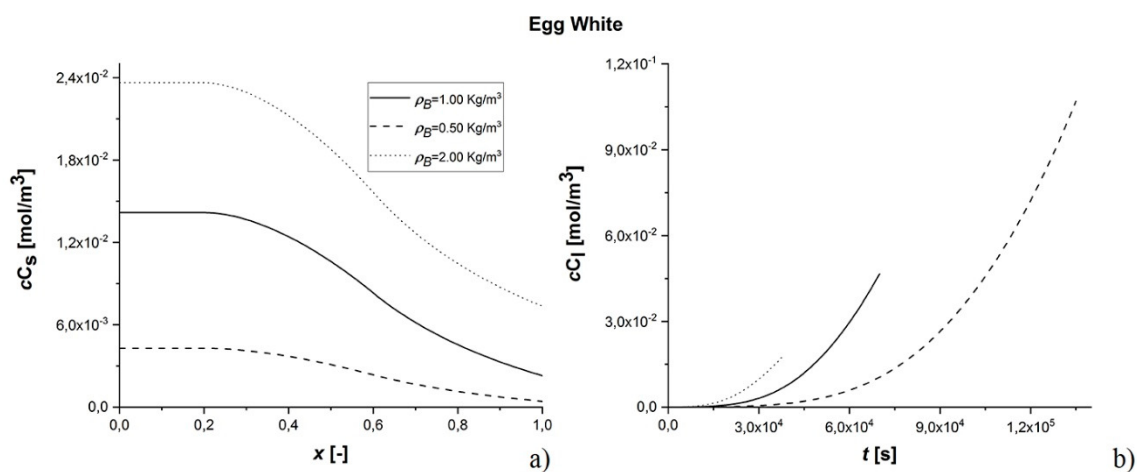

Figure S60. (a) Intraparticle profile of  $c_{Cs}$  at time  $t = 2.7 \cdot 10^4$  s. (b) Bulk profile of  $c_{Cl}$  over time.

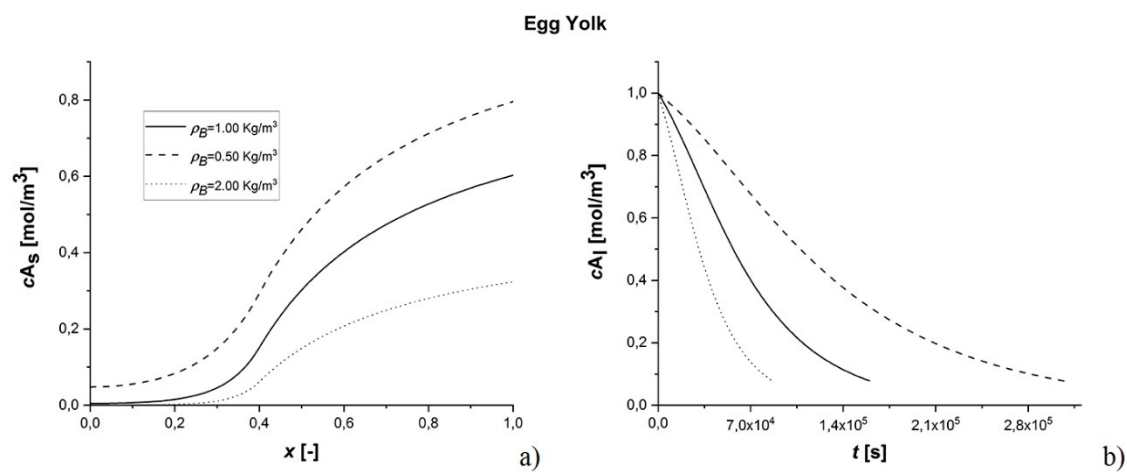

Figure S61. (a) Intraparticle profile of  $c_{As}$  at time  $t = 4.5 \cdot 10^4$  s. (b) Bulk profile of  $c_{Al}$  over time.

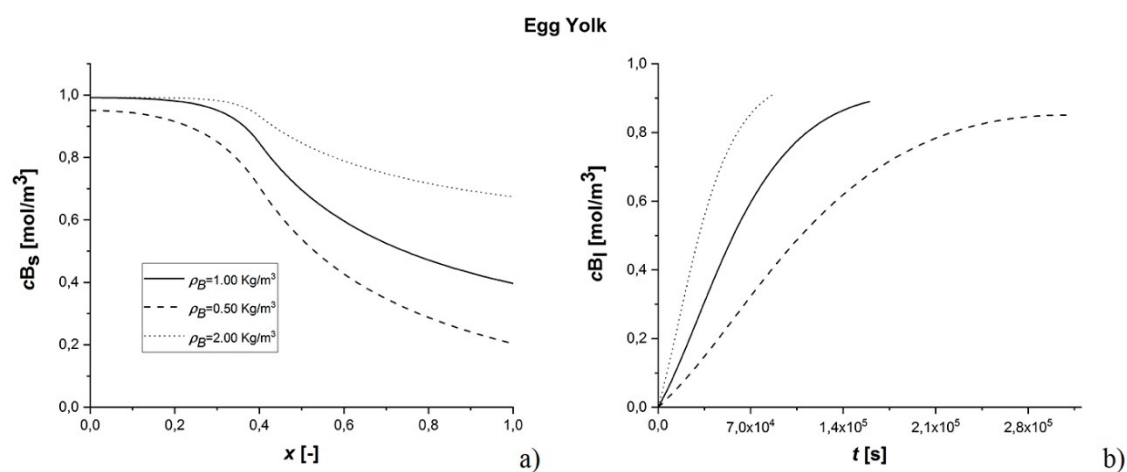

Figure S62. (a) Intraparticle profile of  $c_{Bs}$  at time  $t = 4.5 \cdot 10^4$  s. (b) Bulk profile of  $c_{Bl}$  over time.

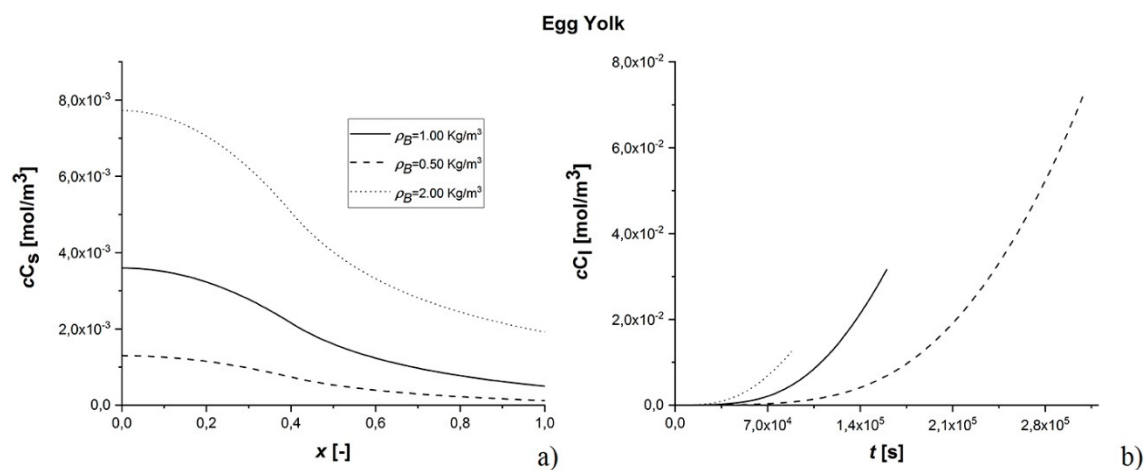

Figure S63. (a) Intraparticle profile of  $c_{Cs}$  at time  $t = 4.5 \cdot 10^4$  s. (b) Bulk profile of  $c_{Cl}$  over time.

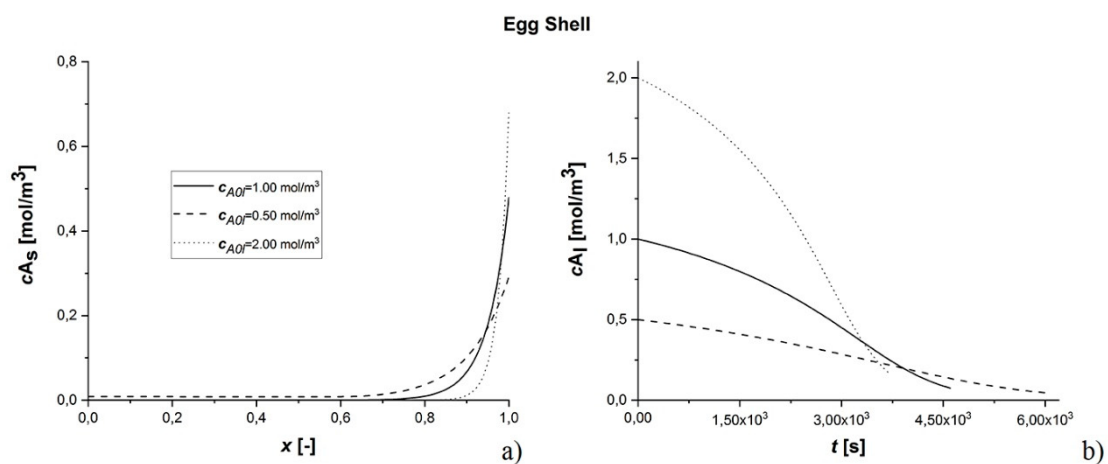

Figure S64. (a) Intraparticle profile of  $c_{As}$  at time  $t = 2.9 \cdot 10^3$  s. (b) Bulk profile of  $c_{Al}$  over time.

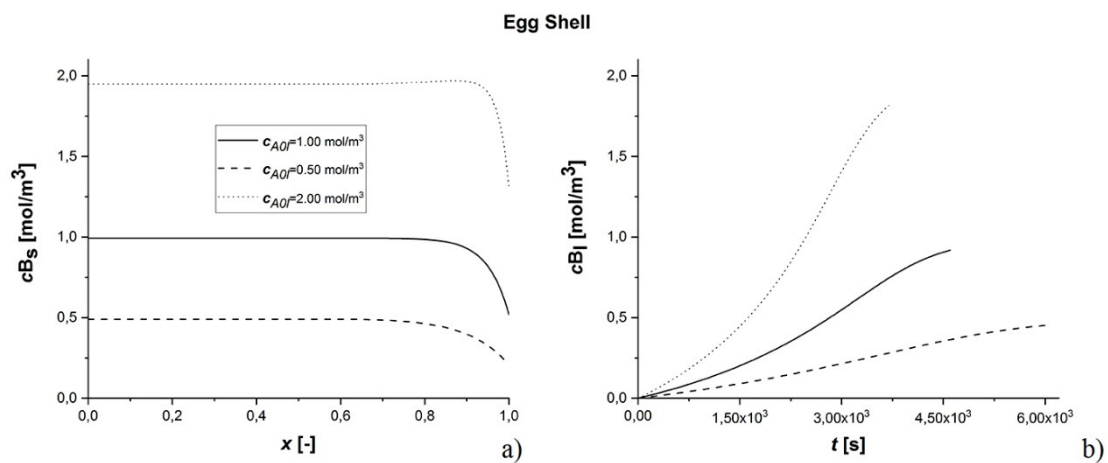

Figure S65. (a) Intraparticle profile of  $c_{Bs}$  at time  $t = 2.9 \cdot 10^3$  s. (b) Bulk profile of  $c_{Bl}$  over time.

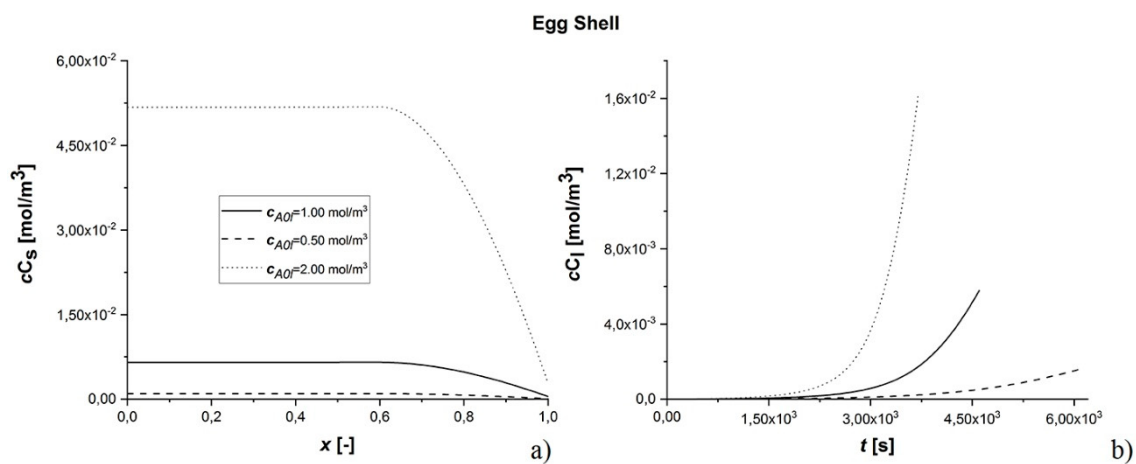

Figure S66. (a) Intraparticle profile of  $c_{Cs}$  at time  $t = 2.9 \cdot 10^3$  s. (b) Bulk profile of  $c_{CI}$  over time.

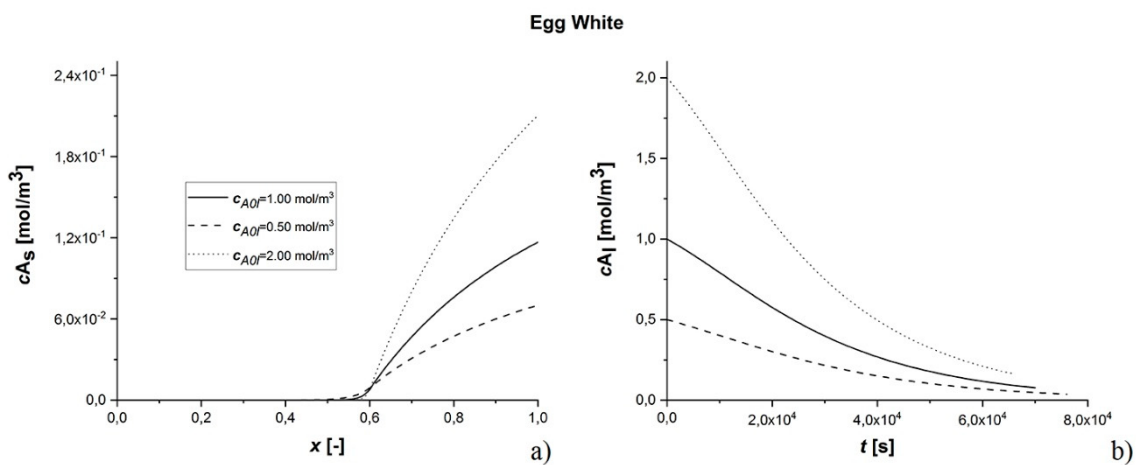

Figure S67. (a) Intraparticle profile of  $c_{As}$  at time  $t = 6.0 \cdot 10^4$  s. (b) Bulk profile of  $c_{AI}$  over time.

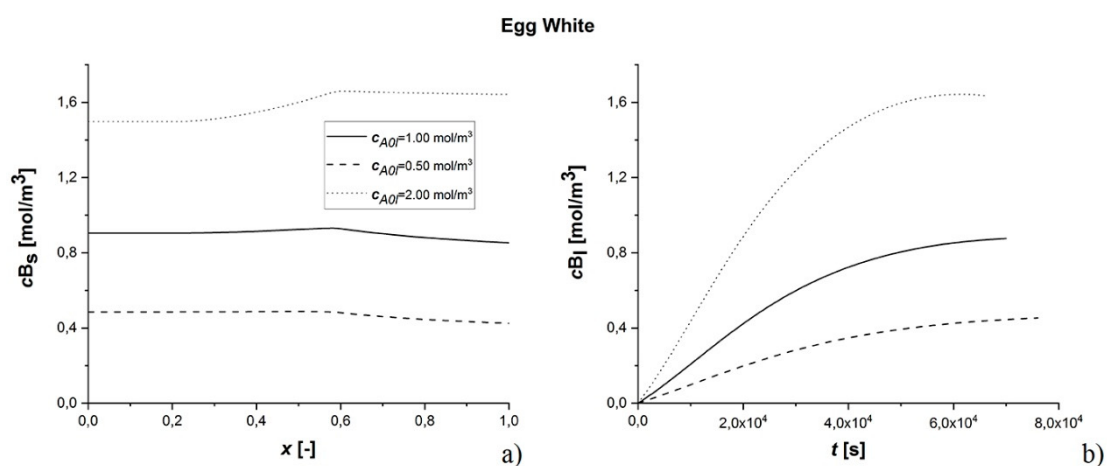

Figure S68. (a) Intraparticle profile of  $c_{Bs}$  at time  $t = 6.0 \cdot 10^4$  s. (b) Bulk profile of  $c_{BI}$  over time.

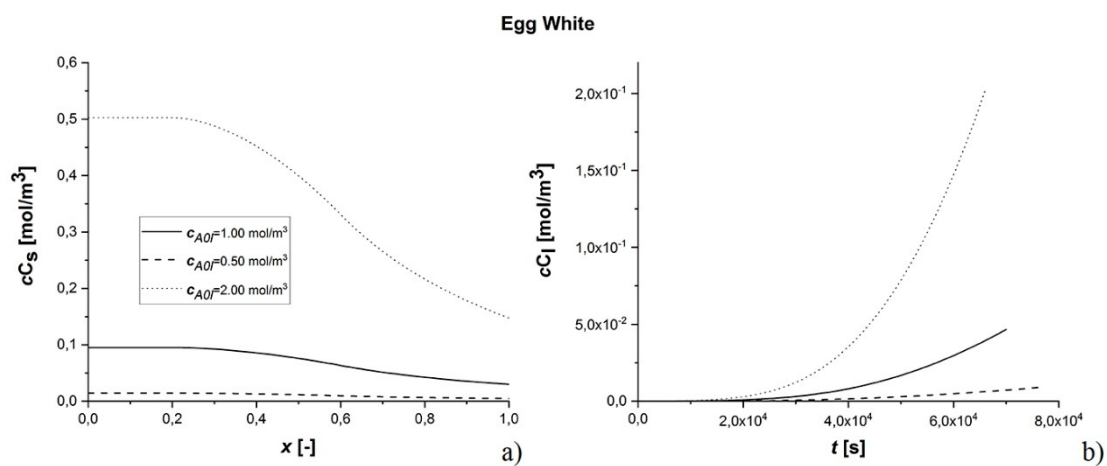

Figure S69. (a) Intraparticle profile of  $c_{Cs}$  at time  $t = 6.0 \cdot 10^4$  s. (b) Bulk profile of  $c_{CI}$  over time.

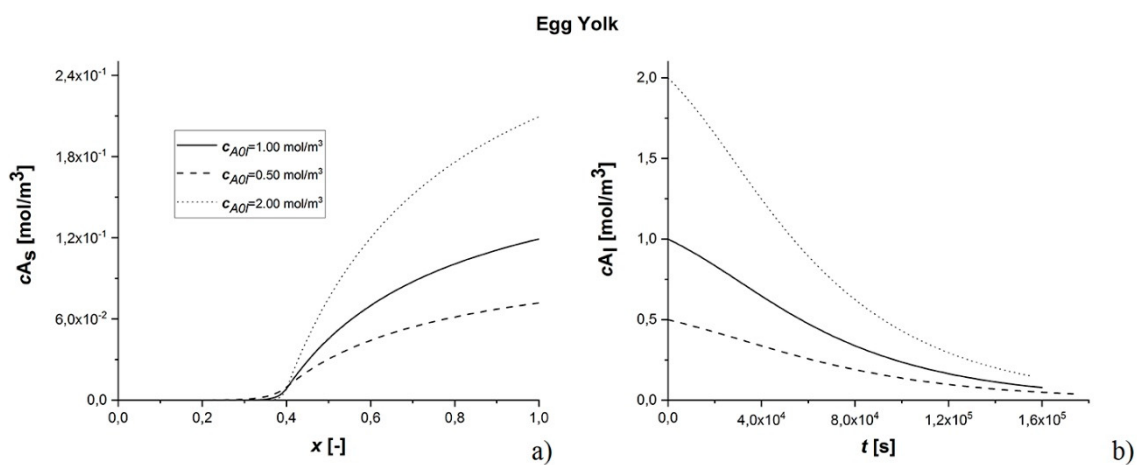

Figure S70. (a) Intraparticle profile of  $c_{As}$  at time  $t = 1.38 \cdot 10^5$  s. (b) Bulk profile of  $c_{AI}$  over time.

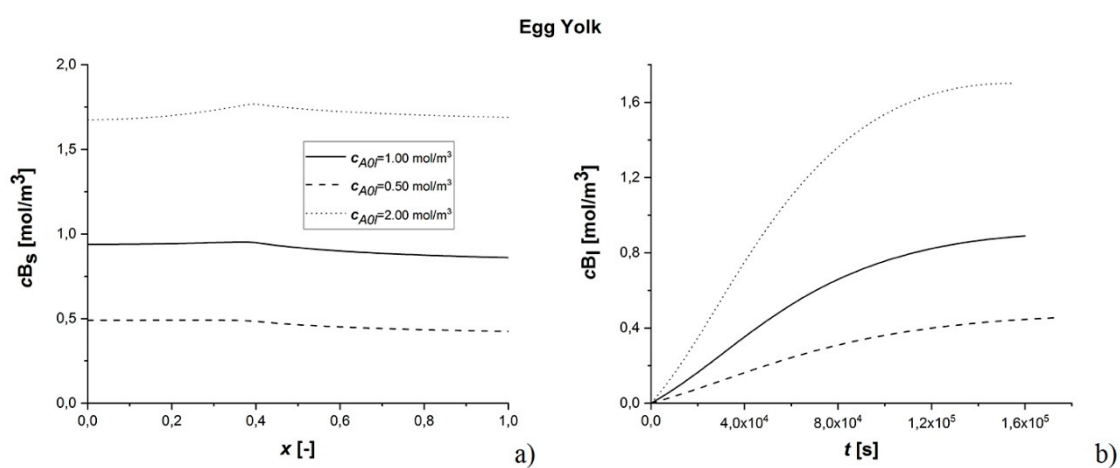

Figure S71. (a) Intraparticle profile of  $c_{Bs}$  at time  $t = 1.38 \cdot 10^5$  s. (b) Bulk profile of  $c_{BI}$  over time.

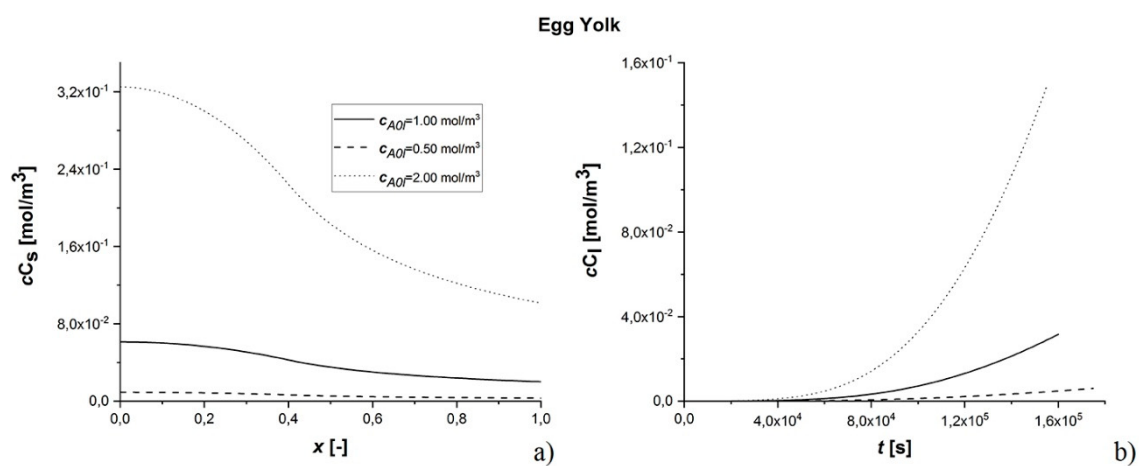

Figure S72. (a) Intraparticle profile of  $c_{Cs}$  at time  $t = 1.38 \cdot 10^5$  s. (b) Bulk profile of  $c_{Cl}$  over time.

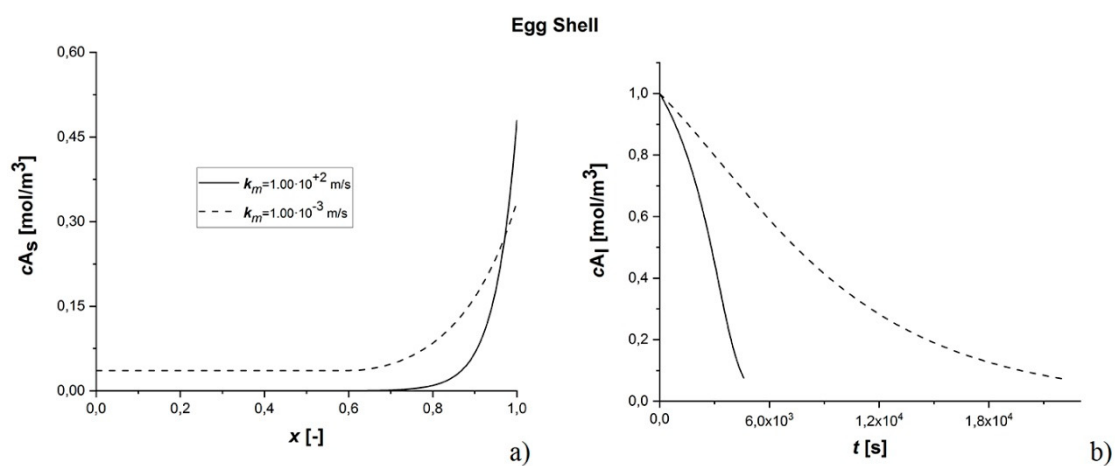

Figure S73. (a) Intraparticle profile of  $c_{As}$  at time  $t = 2.9 \cdot 10^3$  s. (b) Bulk profile of  $c_{Al}$  over time.

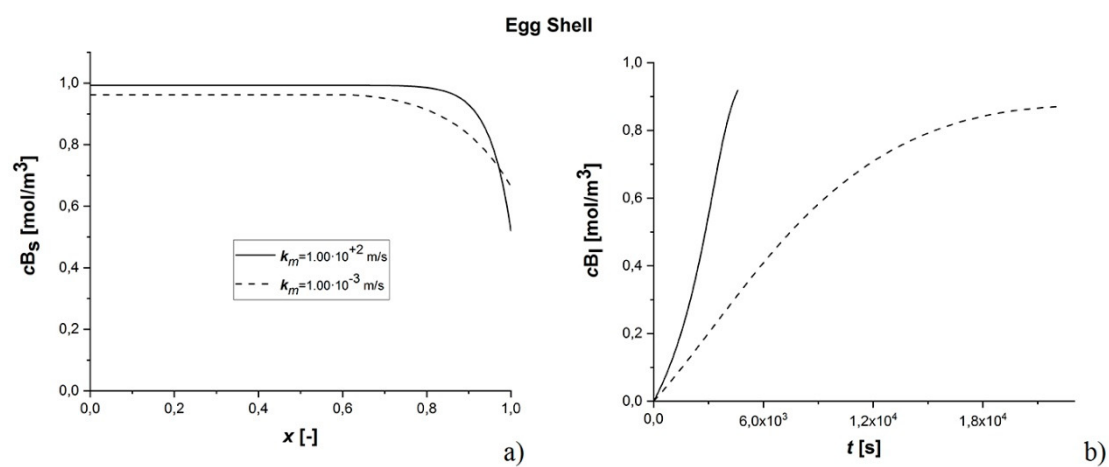

Figure S74. (a) Intraparticle profile of  $c_{Bs}$  at time  $t = 2.9 \cdot 10^3$  s. (b) Bulk profile of  $c_{Bl}$  over time.

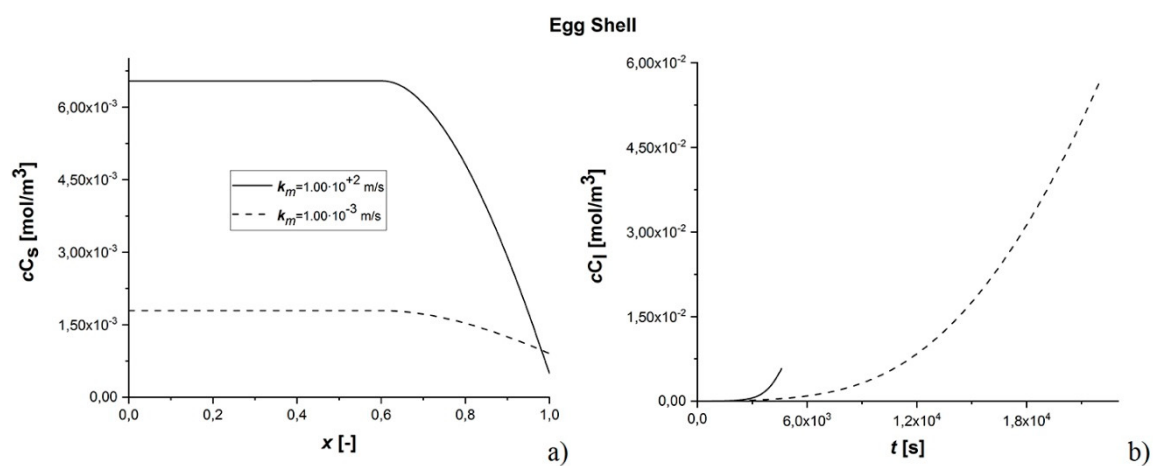

Figure S75. (a) Intraparticle profile of  $c_{Cs}$  at time  $t = 2.9 \cdot 10^3$  s. (b) Bulk profile of  $c_{Cl}$  over time.

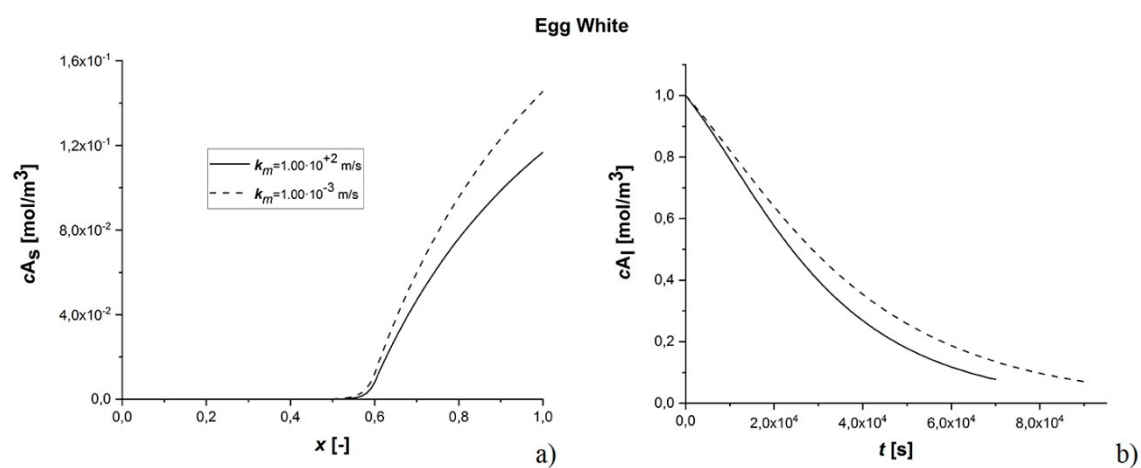

Figure S76. (a) Intraparticle profile of  $c_{As}$  at time  $t = 6.0 \cdot 10^4$  s. (b) Bulk profile of  $c_{Al}$  over time.

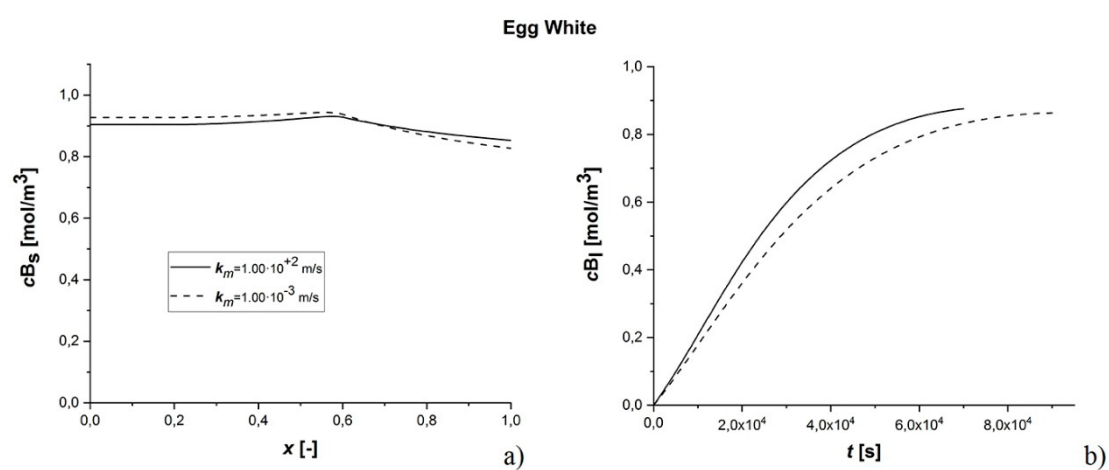

Figure S77. (a) Intraparticle profile of  $c_{Bs}$  at time  $t = 6.0 \cdot 10^4$  s. (b) Bulk profile of  $c_{Bl}$  over time.

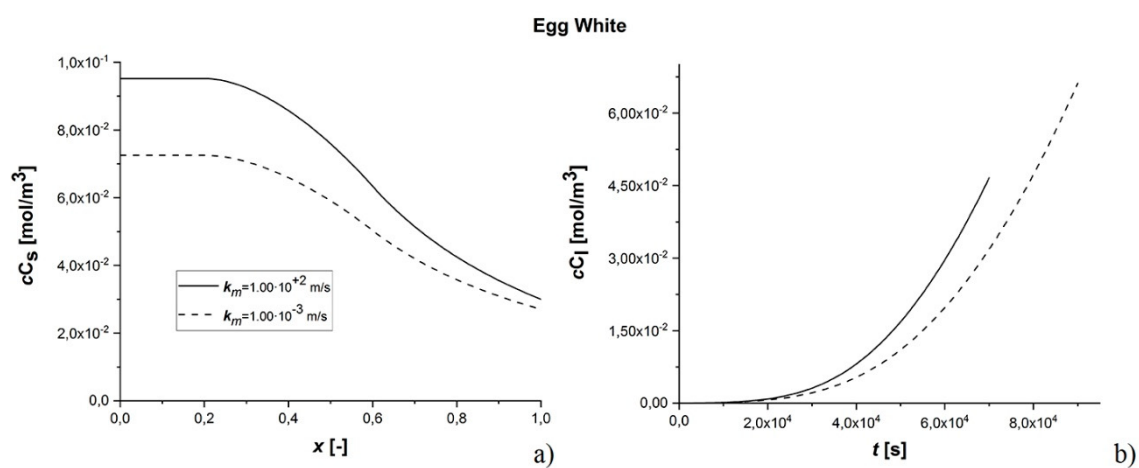

Figure S78. (a) Intraparticle profile of  $c_{Cs}$  at time  $t = 6.0 \cdot 10^4$  s. (b) Bulk profile of  $c_{Cl}$  over time.

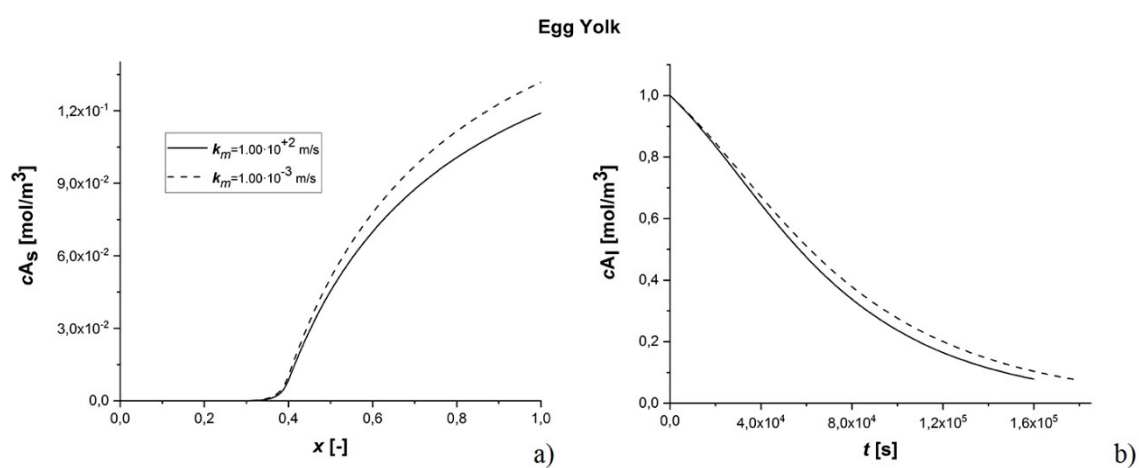

Figure S79. (a) Intraparticle profile of  $c_{As}$  at time  $t = 1.38 \cdot 10^5$  s. (b) Bulk profile of  $c_{Al}$  over time.

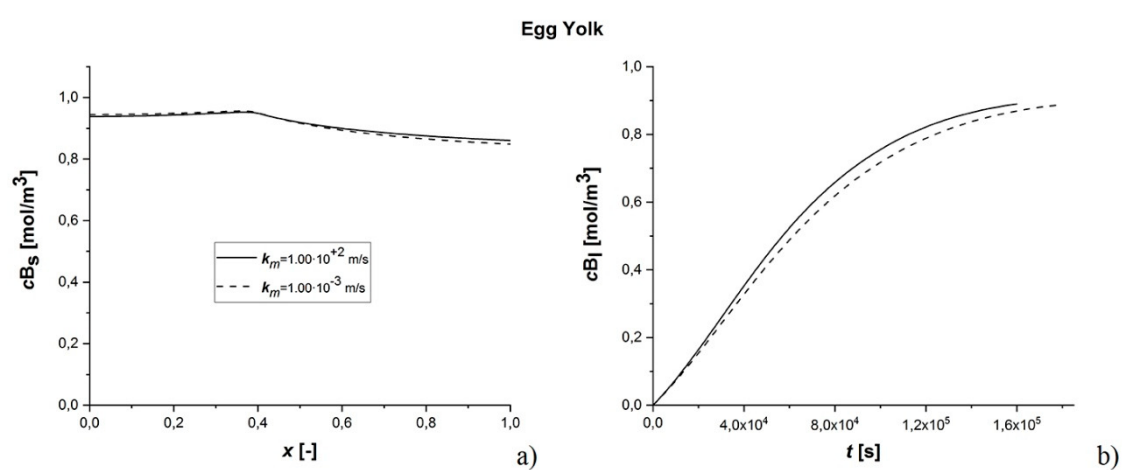

Figure S80. (a) Intraparticle profile of  $c_{Bs}$  at time  $t = 1.38 \cdot 10^5$  s. (b) Bulk profile of  $c_{Bl}$  over time.

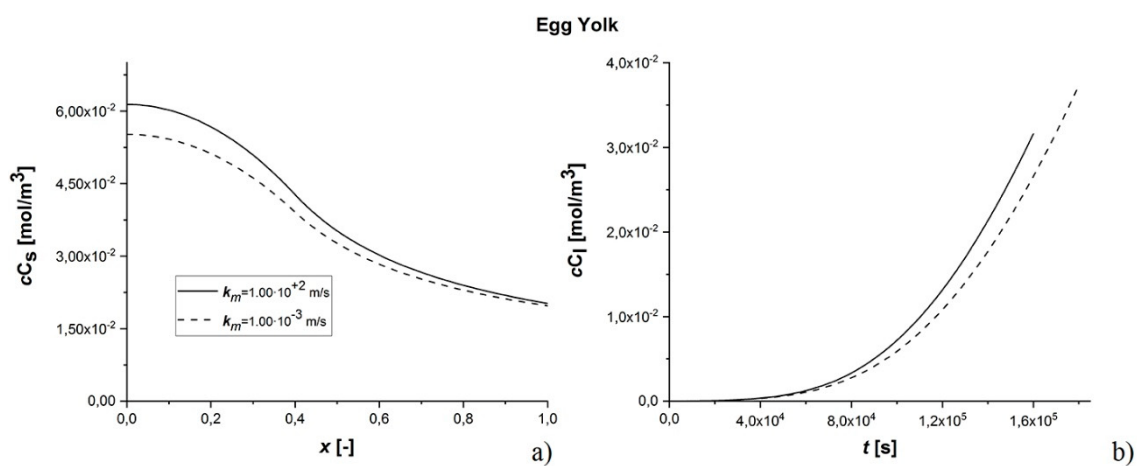

Figure S81. (a) Intraparticle profile of  $c_{Cs}$  at time  $t = 1.38 \cdot 10^5$  s. (b) Bulk profile of  $c_{Cl}$  over time.

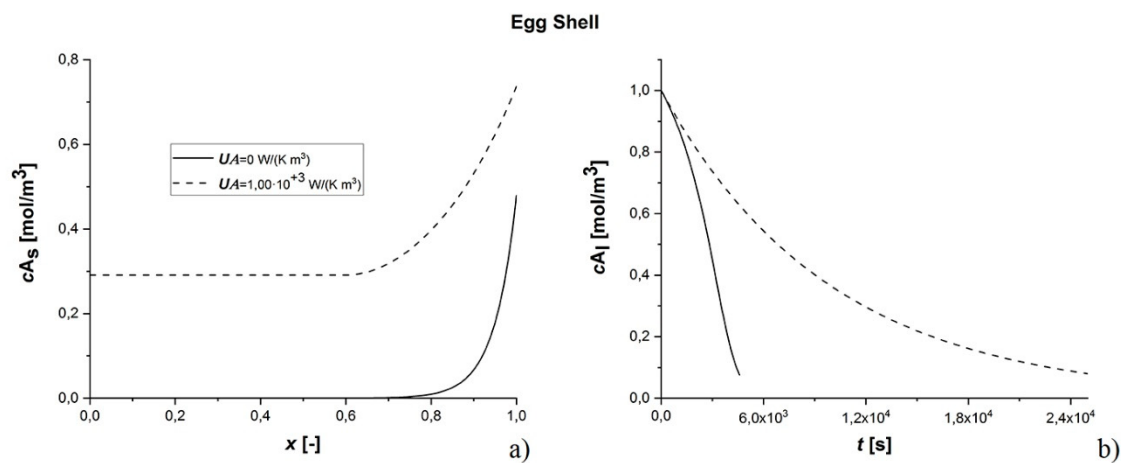

Figure S82. (a) Intraparticle profile of  $c_{As}$  at time  $t = 2.9 \cdot 10^3$  s. (b) Bulk profile of  $c_{Al}$  over time.

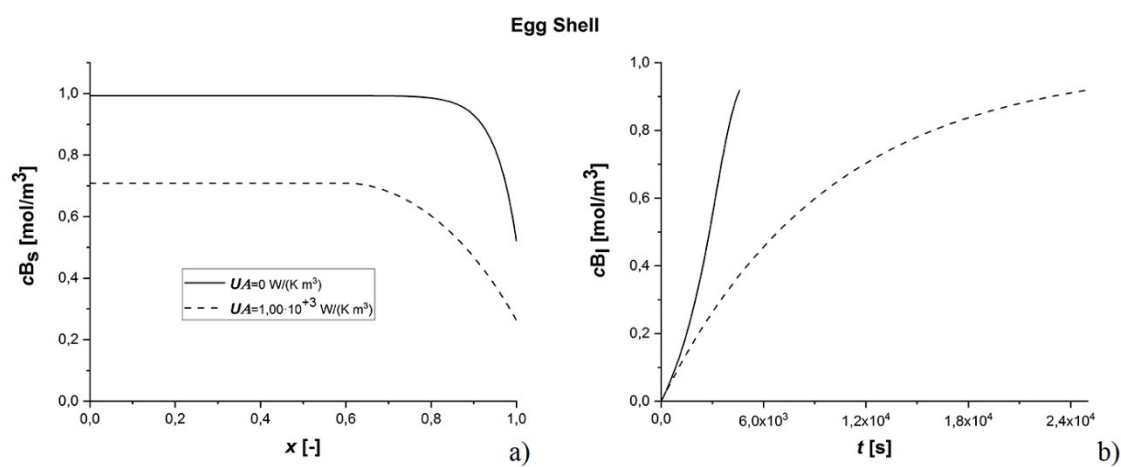

Figure S83. (a) Intraparticle profile of  $c_{Bs}$  at time  $t = 2.9 \cdot 10^3$  s. (b) Bulk profile of  $c_{Bl}$  over time.

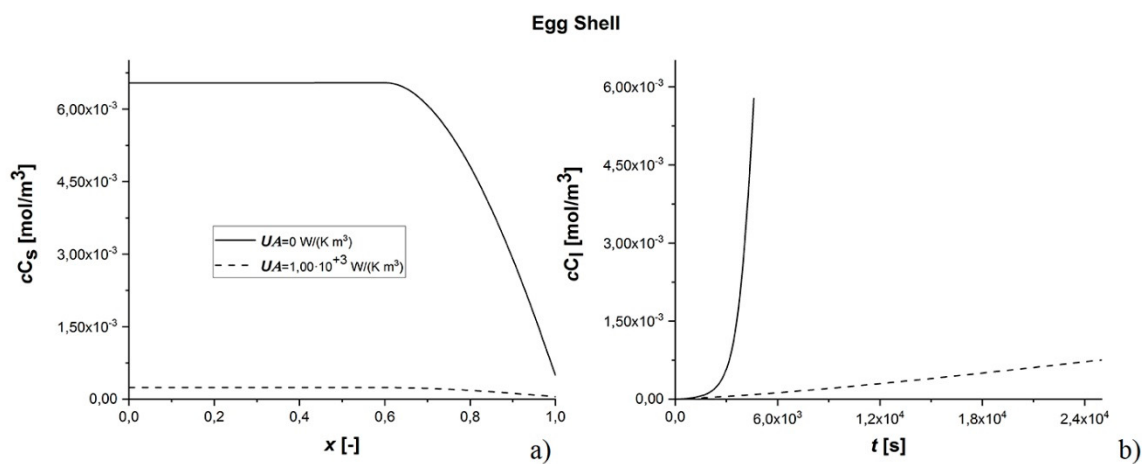

Figure S84. (a) Intraparticle profile of  $c_{Cs}$  at time  $t = 2.9\cdot10^3$  s. (b) Bulk profile of  $c_{Cl}$  over time.

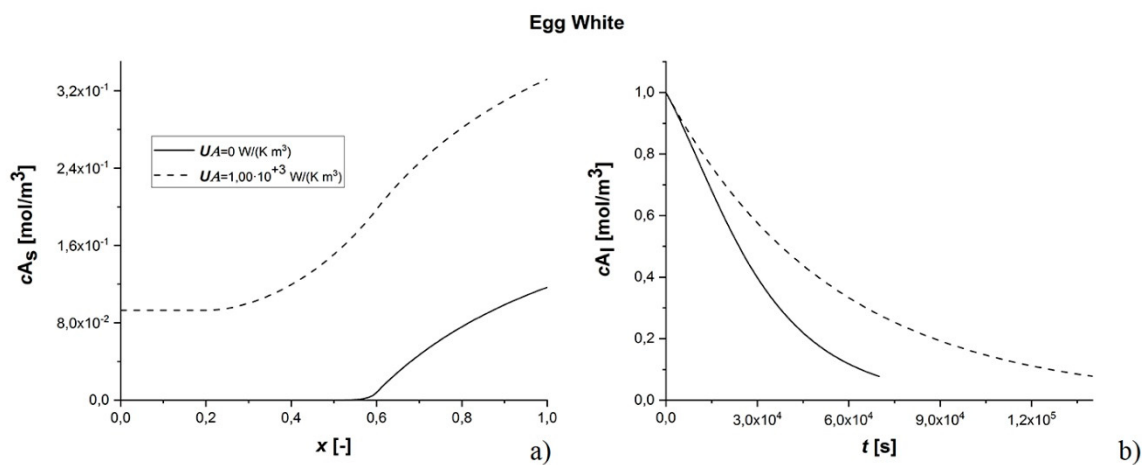

Figure S85. (a) Intraparticle profile of  $c_{As}$  at time  $t = 6.0\cdot10^4$  s. (b) Bulk profile of  $c_{Al}$  over time.

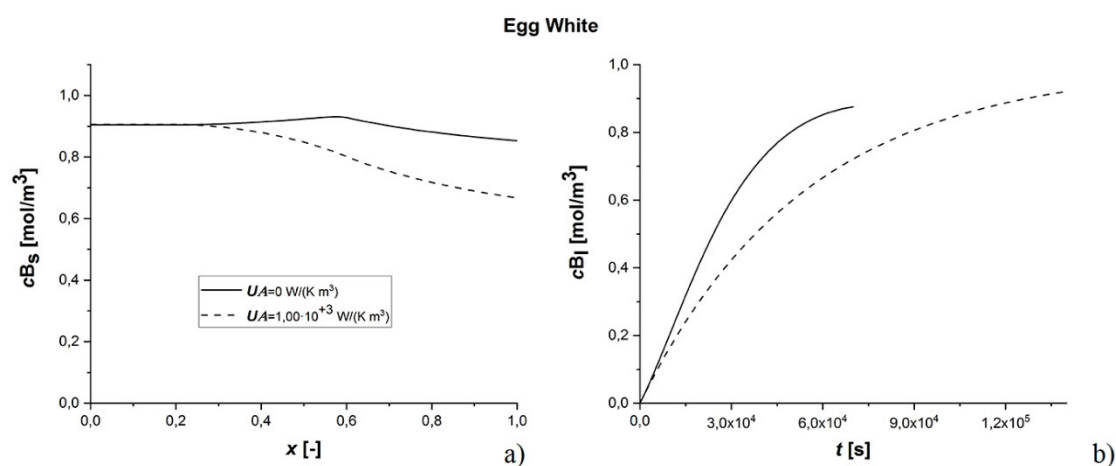

Figure S86. (a) Intraparticle profile of  $c_{Bs}$  at time  $t = 6.0\cdot10^4$  s. (b) Bulk profile of  $c_{Bl}$  over time.

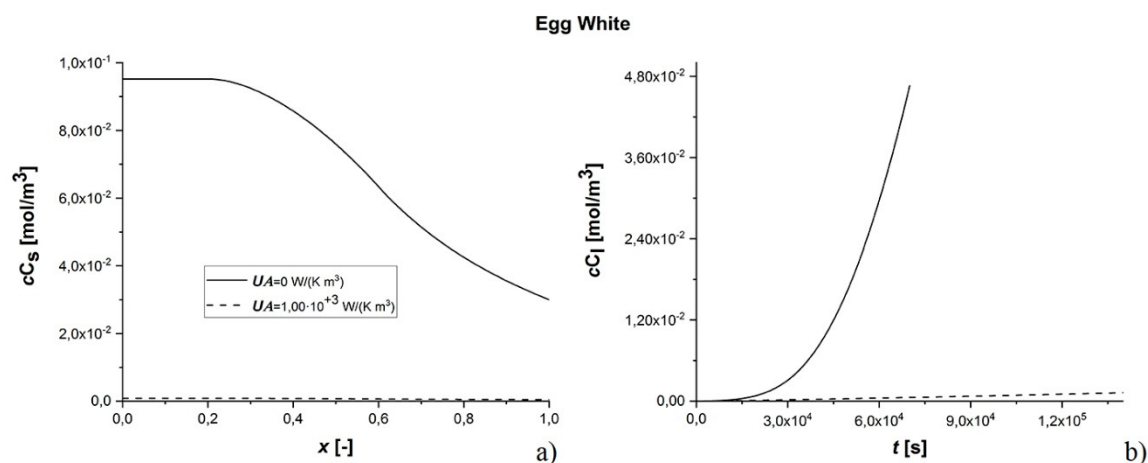

Figure S87. (a) Intraparticle profile of  $c_{Cs}$  at time  $t = 6.0 \cdot 10^4$  s. (b) Bulk profile of  $c_{CI}$  over time.

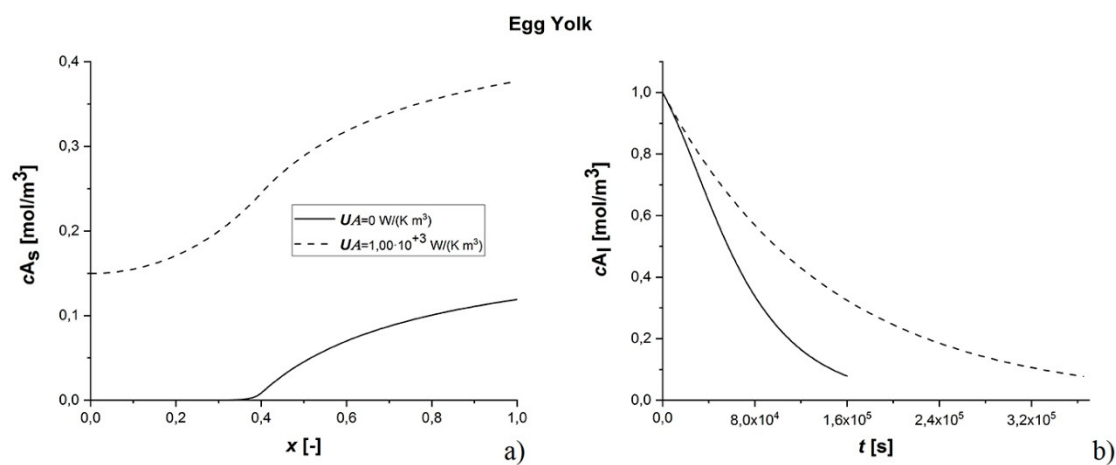

Figure S88. (a) Intraparticle profile of  $c_{As}$  at time  $t = 1.38 \cdot 10^5$  s. (b) Bulk profile of  $c_{AI}$  over time.

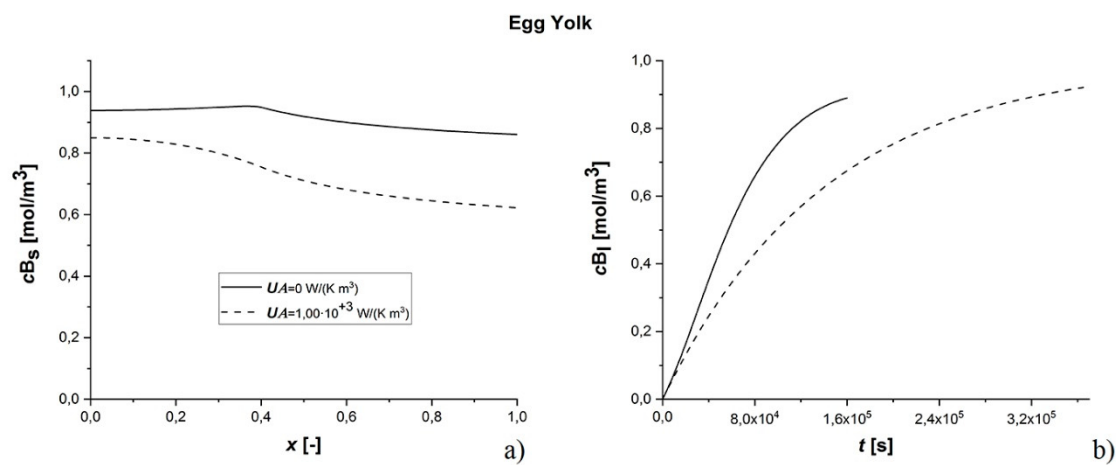

Figure S89. (a) Intraparticle profile of  $c_{Bs}$  at time  $t = 1.38 \cdot 10^5$  s. (b) Bulk profile of  $c_{BI}$  over time.

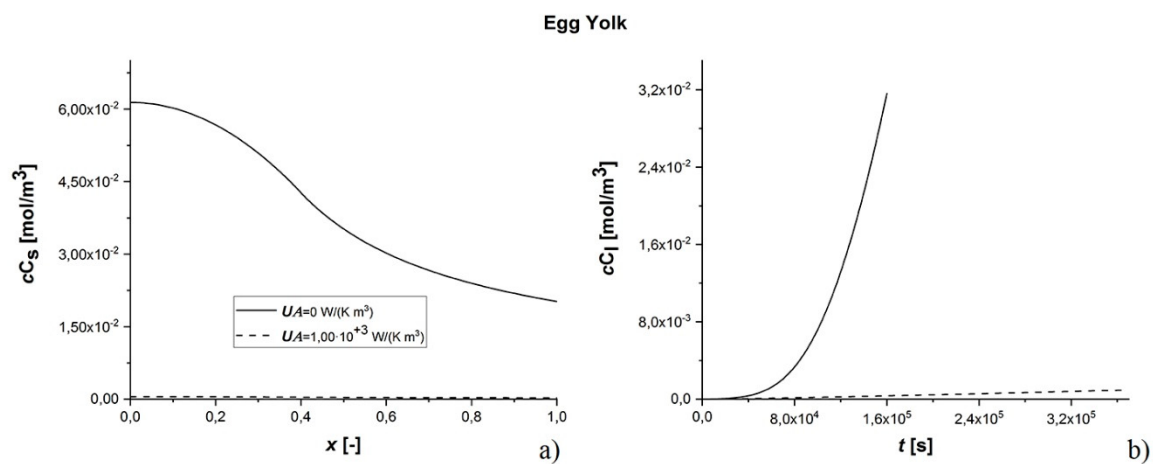

**Figure S90.** (a) Intraparticle profile of  $c_{Cs}$  at time  $t = 1.38 \cdot 10^5$  s. (b) Bulk profile of  $c_{Cl}$  over time.
